# Supplementary material for: How Does Pyridoxamine Inhibit the Formation of Advanced Glycation End Products? The Role of Its Primary Antioxidant Activity
Source: PubMed Central journal article supplement (PMC6770850; doi:10.3390/antiox8090344), 2019-09-01

# Supplementary Materials: How Does Pyridoxamine Inhibit the Formation of Advanced Glycation End Products? The Role of Its Primary Antioxidant Activity

Rafael Ramis <sup>1,2</sup> , Joaquín Ortega-Castro <sup>1,2\*</sup> , Carmen Caballero <sup>1,2</sup>, Rodrigo Casasnovas <sup>1,2</sup> , Antonia Cerrillo <sup>1,2</sup>, Bartolomé Vilanova <sup>1,2</sup> , Miquel Adrover <sup>1,2</sup>  and Juan Frau <sup>1,2</sup> 

## Supporting Information

(50 pages)

### Contents:

**Table S1:** Imaginary frequencies (in  $\text{cm}^{-1}$ ) for each TS corresponding to a combination of reaction site, pyridoxamine tautomer in water and free radical where the standard reaction Gibbs free energy is less than 1 kcal/mol. For HAT reactions, tunneling corrections  $\kappa$  are given in parentheses.

**Table S2:** Imaginary frequencies (in  $\text{cm}^{-1}$ ) for each TS corresponding to a combination of reaction site and free radical in pentyl ethanoate where the standard reaction Gibbs free energy is less than 1 kcal/mol. For HAT reactions, tunneling corrections  $\kappa$  are given in parentheses.

**Table S3:** Activation Gibbs free energies  $\Delta G^\ddagger$  (in kcal/mol), at 298.15 K and 1 bar, for those combinations of reaction site, pyridoxamine tautomer in water and free radical where the standard reaction Gibbs free energy is less than 1 kcal/mol.

**Table S4:** Activation Gibbs free energies  $\Delta G^\ddagger$  (in kcal/mol), at 298.15 K and 1 bar, for those combinations of reaction site and free radical in pentyl ethanoate where the standard reaction Gibbs free energy is less than 1 kcal/mol.

Cartesian coordinates and structures of the optimized geometries in water of the located transition states. In the pictures, distances are given in Å.

Cartesian coordinates and structures of the optimized geometries in pentyl ethanoate of the located transition states. In the pictures, distances are given in Å.

**Table S1.** Imaginary frequencies (in  $\text{cm}^{-1}$ ) for each TS corresponding to a combination of reaction site, pyridoxamine tautomer in water and free radical where the standard reaction Gibbs free energy is less than 1 kcal/mol. For HAT reactions, tunneling corrections  $\kappa$  are given in parentheses. See Figure 1 for nomenclature.

|               | $\text{H}_2\text{PM}(\pm)$ |                        |                       | $\text{H}_2\text{PM}(+)$ |                        |                       | $\text{H}_2\text{PM}(0)$ |                       |
|---------------|----------------------------|------------------------|-----------------------|--------------------------|------------------------|-----------------------|--------------------------|-----------------------|
|               | $\bullet\text{OOH}$        | $\bullet\text{OOCH}_3$ | $\bullet\text{OCH}_3$ | $\bullet\text{OOH}$      | $\bullet\text{OOCH}_3$ | $\bullet\text{OCH}_3$ | $\bullet\text{OCH}_3$    | $\bullet\text{OCH}_3$ |
| <b>HAT-C7</b> | 1853.0<br>(105.6)          | 2243.8<br>(1423.5)     | 1783.4<br>(23.7)      | -                        | -                      | -                     | 1700.8<br>(19.8)         | 1594.4<br>(13.4)      |
| <b>HAT-C8</b> | 2129.1<br>(920.3)          | 2256.2<br>(1747.4)     | 1893.4<br>(46.8)      | 1899.0<br>(270.9)        | 1878.6<br>(172.6)      | -                     | 1663.6<br>(15.8)         | 1852.3<br>(715.8)     |
| <b>HAT-C9</b> | 1841.3<br>(134.2)          | 1891.2<br>(132.4)      | 1475.8<br>(7.9)       | 1811.7<br>(87.1)         | 2033.0<br>(418.7)      | -                     | 1603.0<br>(13.7)         | 1396.9<br>(6.9)       |
| <b>HAT-N2</b> | -                          | -                      | -                     | -                        | -                      | -                     | 1763.7<br>(60.3)         | -                     |
| <b>HAT-O2</b> | -                          | -                      | -                     | -                        | -                      | -                     | 23.7<br>(10022.4)        | 684.8<br>(1.7)        |
| <b>RAF-C2</b> | 471.9                      | 487.8                  | 388.1                 | -                        | -                      | -                     | 566.5                    | 468.0                 |
| <b>RAF-C3</b> | -                          | -                      | -                     | -                        | -                      | -                     | -                        | 534.3                 |
| <b>RAF-C4</b> | 460.0                      | -                      | 385.1                 | -                        | -                      | -                     | 626.6                    | 529.3                 |
| <b>RAF-C6</b> | 459.2                      | 475.4                  | 424.9                 | -                        | -                      | -                     | 566.7                    | 475.2                 |

HAT: Hydrogen-atom transfer. RAF: Radical-adduct formation. The letter and number next to each abbreviation indicate the reaction site, as defined in Figure 1.

**Table S2.** Imaginary frequencies (in  $\text{cm}^{-1}$ ) for each TS corresponding to a combination of reaction site and free radical in pentyl ethanoate where the standard reaction Gibbs free energy is less than 1 kcal/mol. For HAT reactions, tunneling corrections  $\kappa$  are given in parentheses. See Figure 1 for nomenclature.

|               | $\text{HPM}(0)$     |                       |
|---------------|---------------------|-----------------------|
|               | $\bullet\text{OOH}$ | $\bullet\text{OCH}_3$ |
| <b>HAT-C7</b> | -                   | 1553.8 (15.5)         |
| <b>HAT-C8</b> | 1865.3 (64.7)       | 1509.3 (8.4)          |
| <b>HAT-C9</b> | 1608.7 (29.2)       | 1520.8 (11.8)         |
| <b>HAT-N2</b> | -                   | 1340.5 (7.3)          |
| <b>RAF-C2</b> | -                   | 461.3                 |
| <b>RAF-C3</b> | -                   | 457.7                 |
| <b>RAF-C4</b> | -                   | 479.1                 |
| <b>RAF-C6</b> | -                   | 411.4                 |

HAT: Hydrogen-atom transfer. RAF: Radical-adduct formation. The letter and number next to each abbreviation indicate the reaction site, as defined in Figure 1.

**Table S3.** Activation Gibbs free energies  $\Delta G^\ddagger$  (in kcal/mol), at 298.15 K and 1 bar, for those combinations of reaction site, pyridoxamine tautomer in water and free radical where the standard reaction Gibbs free energy is less than 1 kcal/mol. See Figure 1 for nomenclature.

|        | H <sub>2</sub> PM(±) |                    |                   | H <sub>2</sub> PM(+) |                    |                   | H <sub>2</sub> PM(0) |
|--------|----------------------|--------------------|-------------------|----------------------|--------------------|-------------------|----------------------|
|        | •OOH                 | •OOCH <sub>3</sub> | •OCH <sub>3</sub> | •OOH                 | •OOCH <sub>3</sub> | •OCH <sub>3</sub> | •OCH <sub>3</sub>    |
| HAT-C7 | 18.9                 | 15.3               | 12.5              | -                    | -                  | 12.9              | 12.8                 |
| HAT-C8 | 21.8                 | 23.6               | 13.8              | 20.8                 | 20.3               | 12.7              | 16.8                 |
| HAT-C9 | 21.0                 | 21.5               | 11.1              | 19.9                 | 22.5               | 11.9              | 11.8                 |
| HAT-N2 | -                    | -                  | -                 | -                    | -                  | 17.9              | -                    |
| HAT-O2 | -                    | -                  | -                 | -                    | -                  | -                 | 19.5                 |
| RAF-C2 | 11.7                 | 12.4               | 7.0               | -                    | -                  | 18.1              | 17.1                 |
| RAF-C3 | -                    | -                  | -                 | -                    | -                  | -                 | 16.4                 |
| RAF-C4 | 15.0                 | -                  | 8.6               | -                    | -                  | 11.6              | 17.6                 |
| RAF-C6 | 12.4                 | 14.7               | 6.4               | -                    | -                  | 17.5              | 13.2                 |

HAT: Hydrogen-atom transfer. RAF: Radical-adduct formation. The letter and number next to each abbreviation indicate the reaction site, as defined in Figure 1.

**Table S4.** Activation Gibbs free energies  $\Delta G^\ddagger$  (in kcal/mol), at 298.15 K and 1 bar, for those combinations of reaction site and free radical in pentyl ethanoate where the standard reaction Gibbs free energy is less than 1 kcal/mol. See Figure 1 for nomenclature.

|        | HPM(0) |                   |
|--------|--------|-------------------|
|        | •OOH   | •OCH <sub>3</sub> |
| HAT-C7 | -      | 13.9              |
| HAT-C8 | 18.1   | 10.6              |
| HAT-C9 | 19.8   | 12.7              |
| HAT-N2 | -      | 16.0              |
| RAF-C2 | -      | 15.1              |
| RAF-C3 | -      | 13.0              |
| RAF-C4 | -      | 12.4              |
| RAF-C6 | -      | 12.2              |

HAT: Hydrogen-atom transfer. RAF: Radical-adduct formation. The letter and number next to each abbreviation indicate the reaction site, as defined in Figure 1.

Cartesian coordinates and structures of the optimized geometries in water of the located transition states. In the pictures, distances are given in Å.

TS-H<sub>2</sub>PM(±)(-H,C7)(OOH)<sup>+</sup>•

Charge=1, Multiplicity=2

|   |           |           |           |
|---|-----------|-----------|-----------|
| C | 0.523855  | 0.521441  | -0.848941 |
| C | -0.863422 | 0.273661  | -0.616952 |
| C | -1.327021 | -0.992796 | -0.289813 |
| C | -0.422973 | -2.043889 | -0.233660 |
| N | 0.868884  | -1.821641 | -0.491768 |
| H | -0.703689 | -3.057238 | 0.006137  |
| C | -1.761352 | 1.467979  | -0.722716 |
| H | -1.616178 | 1.961325  | -1.680830 |
| H | -2.808249 | 1.228569  | -0.589286 |
| C | -2.770384 | -1.259958 | 0.054927  |
| H | -3.426008 | -0.917531 | -0.742188 |
| H | -2.919589 | -2.330705 | 0.187212  |
| O | 0.970595  | 1.686571  | -1.071610 |
| O | -3.159924 | -0.549866 | 1.232079  |
| H | -2.673059 | -0.916215 | 1.977774  |
| N | -1.383078 | 2.464057  | 0.327973  |
| H | -1.937443 | 3.316131  | 0.240565  |
| H | -1.523492 | 2.076785  | 1.261636  |
| C | 1.399526  | -0.618369 | -0.795571 |
| C | 2.817915  | -0.478563 | -0.945176 |
| H | 3.121424  | 0.334788  | -1.594948 |
| H | 3.158765  | -0.063021 | 0.184773  |
| H | 3.366513  | -1.404861 | -1.086247 |
| H | -0.391787 | 2.697709  | 0.208008  |
| H | 1.505406  | -2.612093 | -0.447222 |
| O | 3.199054  | 0.356056  | 1.449086  |
| O | 1.881620  | 0.324597  | 1.819863  |
| H | 1.739115  | -0.566461 | 2.173243  |

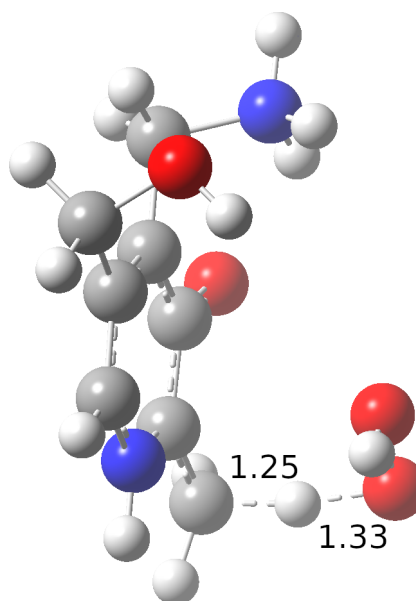

TS-H<sub>2</sub>PM(±)(-H,C8)(OOH)<sup>+</sup>•

Charge=1, Multiplicity=2

|   |           |           |           |
|---|-----------|-----------|-----------|
| C | -0.770781 | -1.038078 | 0.237429  |
| C | -0.078233 | 0.205627  | 0.153524  |
| C | -0.746756 | 1.367050  | -0.290023 |
| C | -2.077147 | 1.295786  | -0.594409 |
| N | -2.725266 | 0.110991  | -0.480056 |
| H | -2.664883 | 2.135953  | -0.927162 |
| C | 1.352193  | 0.244795  | 0.425237  |
| H | 1.925462  | -0.189244 | -0.621027 |
| H | 1.798933  | 1.218441  | 0.578445  |
| C | -0.044452 | 2.695186  | -0.411083 |
| H | 0.870030  | 2.590003  | -0.990841 |
| H | -0.698256 | 3.399577  | -0.923659 |
| O | -0.209231 | -2.138016 | 0.573249  |
| O | 0.343032  | 3.209517  | 0.864131  |
| H | -0.457509 | 3.391769  | 1.366757  |
| N | 1.827175  | -0.711612 | 1.444501  |
| H | 2.812951  | -0.937829 | 1.286964  |
| H | 1.727216  | -0.326596 | 2.385159  |
| C | -2.163732 | -1.026212 | -0.088746 |
| C | -2.967467 | -2.269690 | -0.015472 |
| H | -2.555798 | -3.010503 | -0.702439 |
| H | -2.902671 | -2.685906 | 0.990315  |
| H | -4.008786 | -2.081369 | -0.266555 |
| H | 1.243310  | -1.569254 | 1.345957  |
| H | -3.713297 | 0.090682  | -0.716461 |
| O | 2.707702  | -0.806822 | -1.411991 |
| O | 3.843127  | -1.061886 | -0.679240 |
| H | 4.411141  | -0.290514 | -0.824489 |

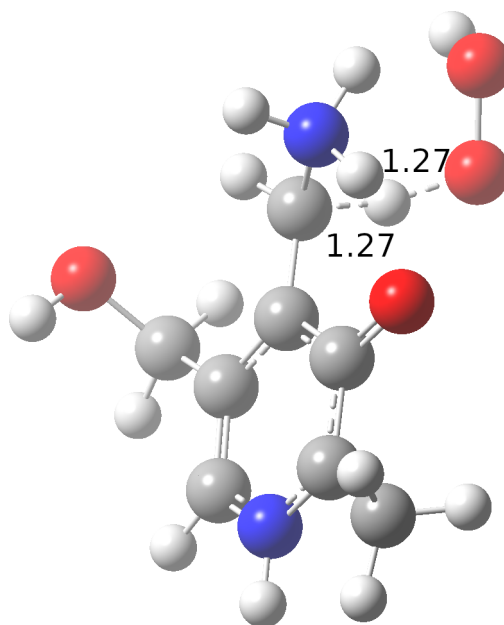

TS-H<sub>2</sub>PM(+)(-H,C8)(OOH)<sup>+</sup>•

Charge=1, Multiplicity=2

|   |           |           |           |
|---|-----------|-----------|-----------|
| C | -0.069015 | -1.036162 | 0.298184  |
| C | -0.150784 | 0.347834  | 0.102320  |
| C | -1.356541 | 0.896700  | -0.369552 |
| C | -2.414510 | 0.056647  | -0.612171 |
| N | -2.284180 | -1.264923 | -0.404568 |
| H | -3.375344 | 0.396417  | -0.965658 |
| C | 1.058862  | 1.169467  | 0.318727  |
| H | 1.794784  | 0.821972  | -0.644691 |
| H | 0.946378  | 2.232862  | 0.130096  |
| C | -1.537548 | 2.379629  | -0.572454 |
| H | -0.755966 | 2.777526  | -1.214722 |
| H | -2.499987 | 2.559028  | -1.050061 |
| O | 1.060163  | -1.655721 | 0.700094  |
| O | -1.449460 | 3.086621  | 0.663541  |
| H | -2.200604 | 2.831499  | 1.209622  |
| N | 1.803184  | 0.807270  | 1.481597  |
| H | 2.586121  | 1.428371  | 1.631591  |
| H | 1.226880  | 0.765728  | 2.316403  |
| C | -1.168695 | -1.853516 | 0.041150  |
| C | -1.128253 | -3.325612 | 0.232122  |
| H | -0.382377 | -3.762195 | -0.432612 |
| H | -0.835673 | -3.552725 | 1.256994  |
| H | -2.099796 | -3.768106 | 0.024748  |
| H | -3.087210 | -1.858807 | -0.593192 |
| H | 1.679524  | -0.970196 | 1.046051  |
| O | 2.661000  | 0.319782  | -1.466953 |
| O | 3.671546  | -0.176999 | -0.692602 |
| H | 3.423145  | -1.097200 | -0.516380 |

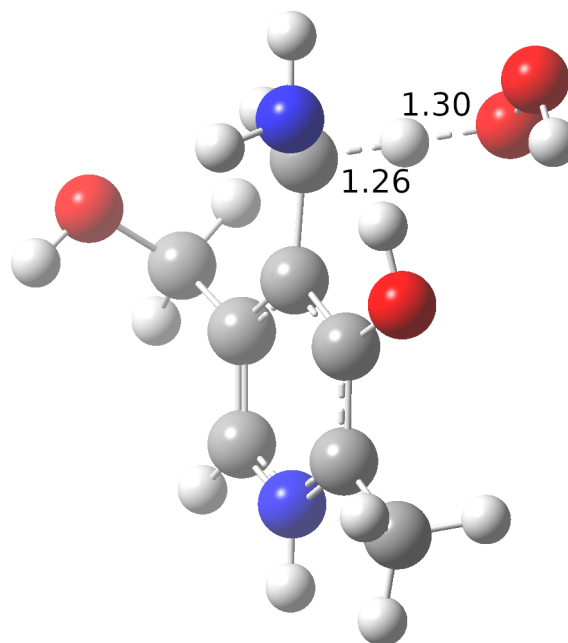

TS-H<sub>2</sub>PM(±)(-H,C9)(OOH)<sup>+</sup>•

Charge=1, Multiplicity=2

|   |           |           |           |
|---|-----------|-----------|-----------|
| C | 1.933861  | -0.099879 | -0.119870 |
| C | 0.741304  | 0.635549  | -0.332572 |
| C | -0.505630 | 0.001381  | -0.359859 |
| C | -0.570919 | -1.361306 | -0.178622 |
| N | 0.573129  | -2.042634 | 0.019496  |
| H | -1.483697 | -1.933309 | -0.184461 |
| C | 0.899706  | 2.110103  | -0.557175 |
| H | 1.480727  | 2.288447  | -1.460062 |
| H | -0.043514 | 2.637627  | -0.624361 |
| C | -1.768607 | 0.785141  | -0.553600 |
| H | -1.810285 | 1.384957  | -1.458494 |
| H | -2.711317 | -0.052940 | -0.731924 |
| O | 3.091951  | 0.455855  | -0.084520 |
| O | -2.144789 | 1.560893  | 0.534059  |
| H | -1.974559 | 1.074780  | 1.351351  |
| N | 1.681125  | 2.703531  | 0.570089  |
| H | 1.886583  | 3.686333  | 0.393919  |
| H | 1.170957  | 2.628909  | 1.450249  |
| C | 1.792534  | -1.504807 | 0.061044  |
| C | 2.975840  | -2.371650 | 0.284114  |
| H | 3.667936  | -2.269243 | -0.552644 |
| H | 3.502535  | -2.047305 | 1.182607  |
| H | 2.688006  | -3.415515 | 0.389754  |
| H | 2.559357  | 2.167638  | 0.639552  |
| H | 0.500178  | -3.047398 | 0.152244  |
| O | -3.734220 | -0.785260 | -0.601282 |
| O | -3.924807 | -0.833140 | 0.765215  |
| H | -4.506302 | -0.083240 | 0.956636  |

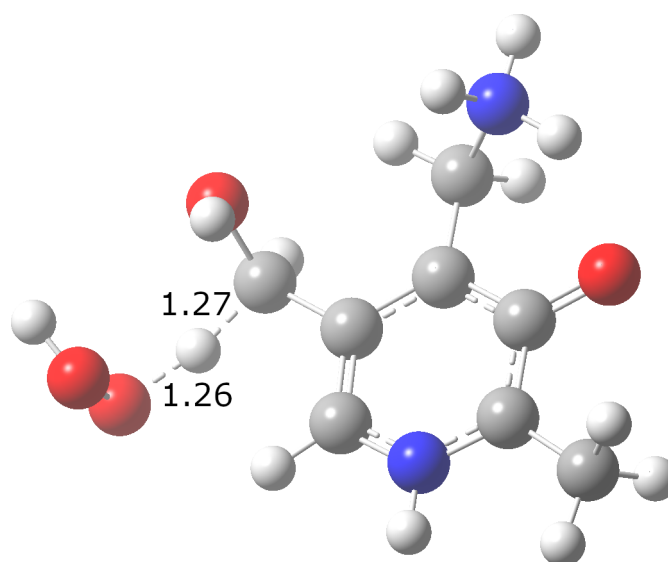

TS-H<sub>2</sub>PM(+)(-H,C9)(OOH)<sup>+</sup>•

Charge=1, Multiplicity=2

|   |           |           |           |
|---|-----------|-----------|-----------|
| C | 1.658975  | 0.157479  | -0.125956 |
| C | 0.401413  | 0.644682  | 0.237728  |
| C | -0.592331 | -0.269535 | 0.630760  |
| C | -0.300190 | -1.616376 | 0.634905  |
| N | 0.927574  | -2.025959 | 0.282237  |
| H | -0.994639 | -2.386761 | 0.926287  |
| C | 0.111082  | 2.120363  | 0.134415  |
| H | -0.210652 | 2.316046  | -0.890514 |
| H | -0.710649 | 2.395904  | 0.791603  |
| C | -1.961424 | 0.191499  | 0.982264  |
| H | -2.005056 | 0.978728  | 1.728982  |
| H | -2.375383 | 0.724110  | -0.081986 |
| O | 2.649180  | 0.966453  | -0.541123 |
| O | -2.881788 | -0.800921 | 1.282471  |
| H | -2.994925 | -1.374557 | 0.509648  |
| N | 1.315395  | 2.923064  | 0.399699  |
| H | 1.186565  | 3.857650  | 0.033780  |
| H | 1.464055  | 3.001499  | 1.399014  |
| C | 1.922936  | -1.213863 | -0.089960 |
| C | 3.244003  | -1.778557 | -0.463824 |
| H | 3.446712  | -1.573965 | -1.515705 |
| H | 4.025234  | -1.297949 | 0.124572  |
| H | 3.268170  | -2.852498 | -0.293646 |
| H | 1.119237  | -3.023755 | 0.305715  |
| H | 2.350281  | 1.911428  | -0.268888 |
| O | -2.833765 | 0.739354  | -1.292171 |
| O | -2.944243 | -0.596783 | -1.597955 |
| H | -2.091588 | -0.834598 | -1.994178 |

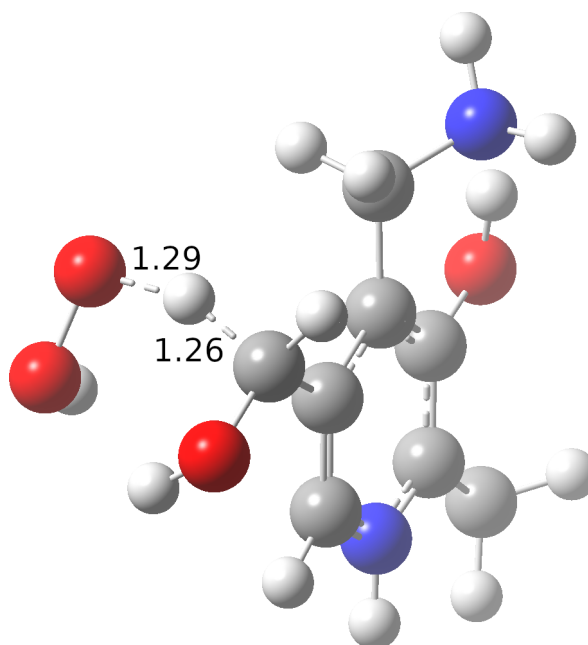



TS-H<sub>2</sub>PM(±)(-H,C7)(OOCH<sub>3</sub>)<sup>+</sup>•

Charge=1, Multiplicity=2

|   |           |           |           |
|---|-----------|-----------|-----------|
| C | -0.001429 | 0.177513  | -0.817985 |
| C | -1.389378 | 0.301382  | -0.517756 |
| C | -2.132837 | -0.778934 | -0.058807 |
| C | -1.513130 | -2.011886 | 0.067607  |
| N | -0.221078 | -2.135881 | -0.252183 |
| H | -2.018088 | -2.900760 | 0.410876  |
| C | -1.979372 | 1.664022  | -0.718182 |
| H | -1.796357 | 2.003180  | -1.735218 |
| H | -3.039183 | 1.705915  | -0.503900 |
| C | -3.578110 | -0.646969 | 0.350314  |
| H | -4.168782 | -0.223631 | -0.458513 |
| H | -3.978887 | -1.630884 | 0.590563  |
| O | 0.704995  | 1.174823  | -1.172074 |
| O | -3.722595 | 0.238497  | 1.462605  |
| H | -3.299803 | -0.168592 | 2.225898  |
| N | -1.291613 | 2.639651  | 0.182962  |
| H | -1.634202 | 3.586771  | 0.022564  |
| H | -1.446735 | 2.400004  | 1.162847  |
| C | 0.567137  | -1.132873 | -0.687607 |
| C | 1.964345  | -1.378170 | -0.925111 |
| H | 2.416468  | -0.722936 | -1.662297 |
| H | 2.548479  | -0.999193 | 0.129968  |
| H | 2.245555  | -2.423244 | -1.013091 |
| H | -0.286152 | 2.605140  | -0.019091 |
| H | 0.204291  | -3.053972 | -0.159802 |
| O | 3.192378  | -0.605751 | 1.183246  |
| O | 4.353850  | -0.041591 | 0.741329  |
| C | 4.123205  | 1.335922  | 0.428337  |
| H | 3.767936  | 1.857341  | 1.315100  |
| H | 5.087647  | 1.725222  | 0.112512  |
| H | 3.395031  | 1.405391  | -0.379574 |

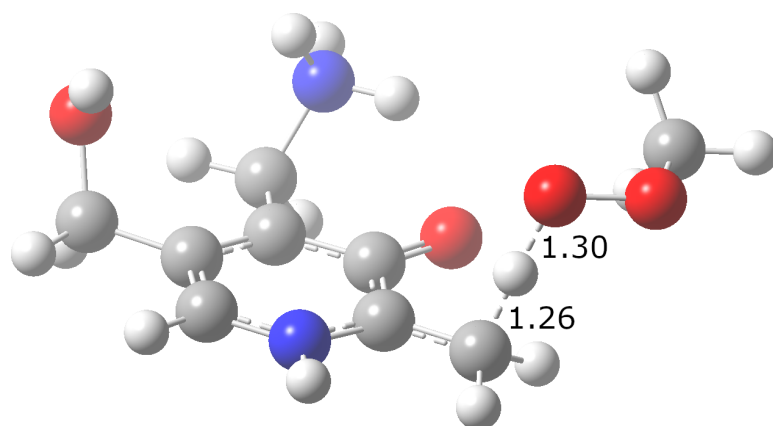

TS-H<sub>2</sub>PM(±)(-H,C8a)(OOCH<sub>3</sub>)<sup>+</sup>•

Charge=1, Multiplicity=2

|   |           |           |           |
|---|-----------|-----------|-----------|
| C | 0.496744  | 1.098113  | 0.420462  |
| C | 0.399926  | -0.316084 | 0.255520  |
| C | 1.440610  | -1.029327 | -0.382651 |
| C | 2.550000  | -0.355972 | -0.809405 |
| N | 2.629278  | 0.984662  | -0.627200 |
| H | 3.390402  | -0.825356 | -1.294610 |
| C | -0.814158 | -1.017085 | 0.641624  |
| H | -1.613006 | -0.953596 | -0.368426 |
| H | -0.730409 | -2.083743 | 0.802233  |
| C | 1.382004  | -2.523628 | -0.579417 |
| H | 0.441756  | -2.814742 | -1.043182 |
| H | 2.195988  | -2.829564 | -1.235409 |
| O | -0.421069 | 1.816923  | 0.951366  |
| O | 1.451385  | -3.224832 | 0.663429  |
| H | 2.314371  | -3.055435 | 1.055324  |
| N | -1.601888 | -0.385291 | 1.718532  |
| H | -2.598478 | -0.582885 | 1.605849  |
| H | -1.306284 | -0.724518 | 2.635799  |
| C | 1.692777  | 1.725382  | -0.048187 |
| C | 1.884761  | 3.189071  | 0.085540  |
| H | 1.097707  | 3.712828  | -0.458681 |
| H | 1.800730  | 3.474518  | 1.134597  |
| H | 2.856022  | 3.491600  | -0.298753 |
| H | -1.429739 | 0.645480  | 1.650039  |
| H | 3.463697  | 1.459225  | -0.960229 |
| O | -2.595304 | -0.902825 | -1.158733 |
| O | -3.558037 | -0.159797 | -0.528956 |
| C | -3.375154 | 1.226965  | -0.843385 |
| H | -3.436344 | 1.365475  | -1.920754 |
| H | -4.188995 | 1.742401  | -0.339961 |
| H | -2.410009 | 1.562355  | -0.460601 |

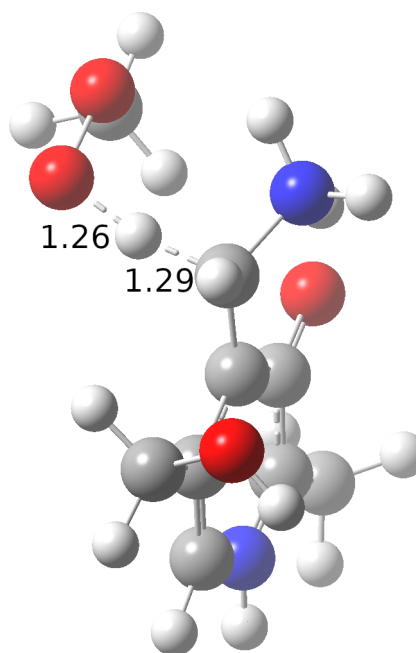

TS-H<sub>2</sub>PM(+)(-H,C8)(OOCH<sub>3</sub>)<sup>+</sup>•

Charge=1, Multiplicity=2

|   |           |           |           |
|---|-----------|-----------|-----------|
| C | -1.217302 | -0.749019 | 0.494833  |
| C | -0.208312 | 0.221242  | 0.465568  |
| C | -0.435919 | 1.400134  | -0.274869 |
| C | -1.604603 | 1.536273  | -0.977651 |
| N | -2.521054 | 0.553172  | -0.950663 |
| H | -1.844389 | 2.405187  | -1.570315 |
| C | 1.084844  | 0.052862  | 1.182419  |
| H | 1.962848  | 0.241042  | 0.296511  |
| H | 1.278030  | 0.860976  | 1.881657  |
| C | 0.547987  | 2.543134  | -0.289863 |
| H | 1.543828  | 2.195207  | -0.550933 |
| H | 0.232629  | 3.271704  | -1.035375 |
| O | -1.158500 | -1.885041 | 1.221622  |
| O | 0.657724  | 3.156782  | 0.994135  |
| H | -0.182440 | 3.580903  | 1.196816  |
| N | 1.352447  | -1.227275 | 1.741509  |
| H | 1.625830  | -1.907104 | 1.035681  |
| H | 2.071071  | -1.180917 | 2.451406  |
| C | -2.390844 | -0.570774 | -0.241184 |
| C | -3.479675 | -1.579643 | -0.248353 |
| H | -3.841587 | -1.733899 | 0.768352  |
| H | -4.301503 | -1.250816 | -0.879499 |
| H | -3.097674 | -2.532768 | -0.613813 |
| H | -3.376677 | 0.679430  | -1.484175 |
| H | -0.304729 | -1.885434 | 1.713889  |
| O | 2.913216  | 0.091399  | -0.594517 |
| O | 3.043041  | -1.261619 | -0.721068 |
| C | 2.176588  | -1.731588 | -1.765184 |
| H | 2.448455  | -1.252870 | -2.703461 |
| H | 2.345282  | -2.804100 | -1.814750 |
| H | 1.140837  | -1.515710 | -1.503590 |

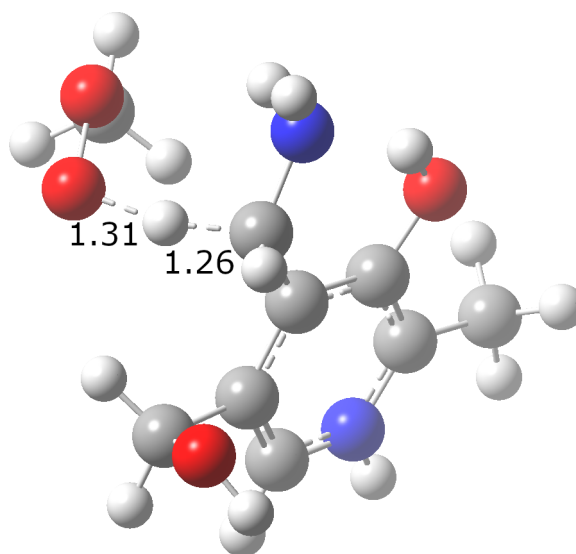

TS-H<sub>2</sub>PM(±)(-H,C9)(OOCH<sub>3</sub>)<sup>+</sup>•

Charge=1, Multiplicity=2

|   |           |           |           |
|---|-----------|-----------|-----------|
| C | 2.014563  | 0.584705  | -0.226318 |
| C | 0.637057  | 0.360735  | 0.020115  |
| C | 0.153177  | -0.923228 | 0.295086  |
| C | 1.029648  | -1.987744 | 0.282466  |
| N | 2.329589  | -1.756314 | 0.027821  |
| H | 0.744364  | -3.009120 | 0.473807  |
| C | -0.249519 | 1.566623  | -0.086885 |
| H | -0.181707 | 1.981338  | -1.091048 |
| H | -1.283938 | 1.367493  | 0.155534  |
| C | -1.274750 | -1.212073 | 0.582432  |
| H | -1.910829 | -0.893344 | -0.467482 |
| H | -1.491249 | -2.271781 | 0.700532  |
| O | 2.492013  | 1.754334  | -0.460854 |
| O | -1.784179 | -0.424355 | 1.609144  |
| H | -2.656538 | -0.756113 | 1.853210  |
| N | 0.247166  | 2.629537  | 0.839851  |
| H | -0.278845 | 3.494382  | 0.719227  |
| H | 0.170360  | 2.332779  | 1.812732  |
| C | 2.863495  | -0.558025 | -0.212293 |
| C | 4.318331  | -0.440339 | -0.478622 |
| H | 4.477662  | -0.024963 | -1.474726 |
| H | 4.767267  | 0.249108  | 0.237295  |
| H | 4.810254  | -1.408082 | -0.407421 |
| H | 1.238635  | 2.789172  | 0.608992  |
| H | 2.957729  | -2.555215 | 0.026681  |
| O | -2.637417 | -0.351131 | -1.384586 |
| O | -3.505061 | 0.454341  | -0.694528 |
| C | -4.669788 | -0.302054 | -0.345062 |
| H | -5.308811 | 0.388221  | 0.199794  |
| H | -5.163975 | -0.652394 | -1.249061 |
| H | -4.383790 | -1.141162 | 0.289307  |

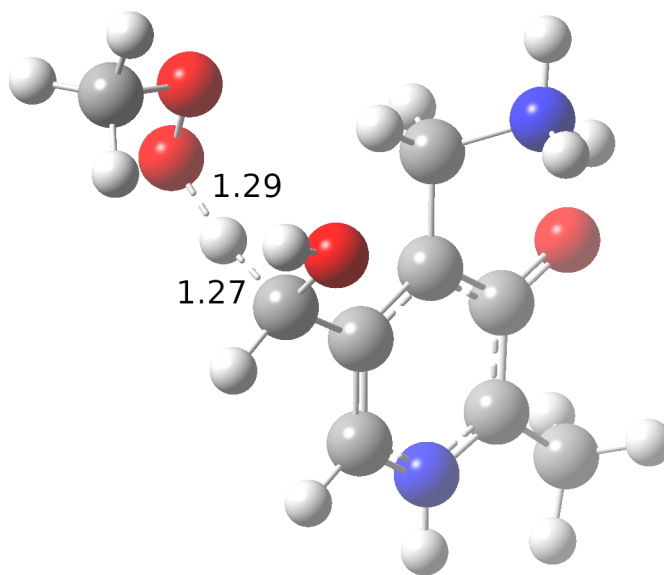

TS-H<sub>2</sub>PM(+)(-H,C9)(OOCH<sub>3</sub>)<sup>+</sup>•

Charge=1, Multiplicity=2

|   |           |           |           |
|---|-----------|-----------|-----------|
| C | 2.095675  | 0.340320  | -0.223655 |
| C | 0.737220  | 0.468090  | 0.082022  |
| C | 0.016617  | -0.682065 | 0.437253  |
| C | 0.654498  | -1.902316 | 0.428009  |
| N | 1.953491  | -1.969754 | 0.104109  |
| H | 0.168056  | -2.832232 | 0.677084  |
| C | 0.085532  | 1.818967  | -0.071768 |
| H | -0.084257 | 1.965958  | -1.140733 |
| H | -0.878469 | 1.844958  | 0.427003  |
| C | -1.421085 | -0.655960 | 0.812794  |
| H | -2.047210 | -0.146058 | -0.163850 |
| H | -1.868105 | -1.647695 | 0.873838  |
| O | 2.848354  | 1.399890  | -0.570009 |
| O | -1.658740 | 0.129626  | 1.936725  |
| H | -2.577217 | 0.008812  | 2.206831  |
| N | 0.989359  | 2.886074  | 0.389046  |
| H | 0.656025  | 3.779035  | 0.047953  |
| H | 0.986922  | 2.924830  | 1.401741  |
| C | 2.711088  | -0.911550 | -0.208986 |
| C | 4.143437  | -1.100943 | -0.547235 |
| H | 4.323432  | -0.781154 | -1.574045 |
| H | 4.758554  | -0.482132 | 0.105948  |
| H | 4.429856  | -2.144266 | -0.438527 |
| H | 2.397653  | -2.884114 | 0.106177  |
| H | 2.315376  | 2.215003  | -0.255549 |
| O | -2.791000 | 0.349547  | -1.084398 |
| O | -3.792886 | -0.567997 | -1.272186 |
| C | -4.823028 | -0.343351 | -0.303462 |
| H | -5.210617 | 0.668210  | -0.407550 |
| H | -5.593915 | -1.076203 | -0.527182 |
| H | -4.421594 | -0.502869 | 0.697908  |

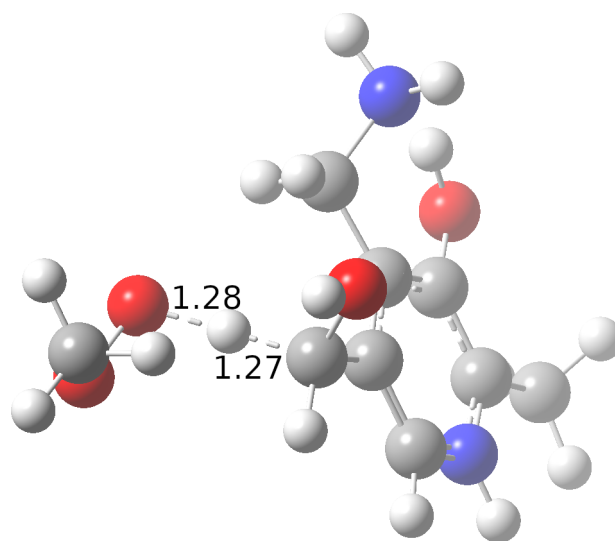

TS-H<sub>2</sub>PM(±)(-H,C7)(OCH<sub>3</sub>)<sup>+</sup>•

Charge=1, Multiplicity=2

|   |           |           |           |
|---|-----------|-----------|-----------|
| C | 0.333725  | 0.251280  | -0.629790 |
| C | -1.078259 | 0.317492  | -0.465327 |
| C | -1.823095 | -0.807885 | -0.125274 |
| C | -1.172372 | -2.018224 | 0.027995  |
| N | 0.152304  | -2.079346 | -0.160858 |
| H | -1.670068 | -2.938524 | 0.288802  |
| C | -1.701836 | 1.663009  | -0.685324 |
| H | -1.485978 | 2.012002  | -1.693097 |
| H | -2.770803 | 1.671483  | -0.517412 |
| C | -3.311226 | -0.751362 | 0.113303  |
| H | -3.817060 | -0.291462 | -0.732042 |
| H | -3.696456 | -1.763156 | 0.235271  |
| O | 1.040897  | 1.285200  | -0.885737 |
| O | -3.628265 | 0.045706  | 1.255728  |
| H | -3.271168 | -0.393290 | 2.034612  |
| N | -1.082416 | 2.655753  | 0.245007  |
| H | -1.429326 | 3.595928  | 0.057820  |
| H | -1.284460 | 2.421716  | 1.217430  |
| C | 0.931148  | -1.037191 | -0.487703 |
| C | 2.368348  | -1.229580 | -0.637166 |
| H | 2.789764  | -0.635028 | -1.444008 |
| H | 2.879009  | -0.773191 | 0.333219  |
| H | 2.669587  | -2.272787 | -0.678324 |
| H | -0.065672 | 2.626938  | 0.091829  |
| H | 0.603226  | -2.984190 | -0.058954 |
| O | 3.618643  | -0.052345 | 1.283278  |
| C | 4.529021  | 0.720729  | 0.540239  |
| H | 5.136904  | 1.250445  | 1.283887  |
| H | 5.196043  | 0.097994  | -0.058774 |
| H | 4.024315  | 1.462171  | -0.081169 |

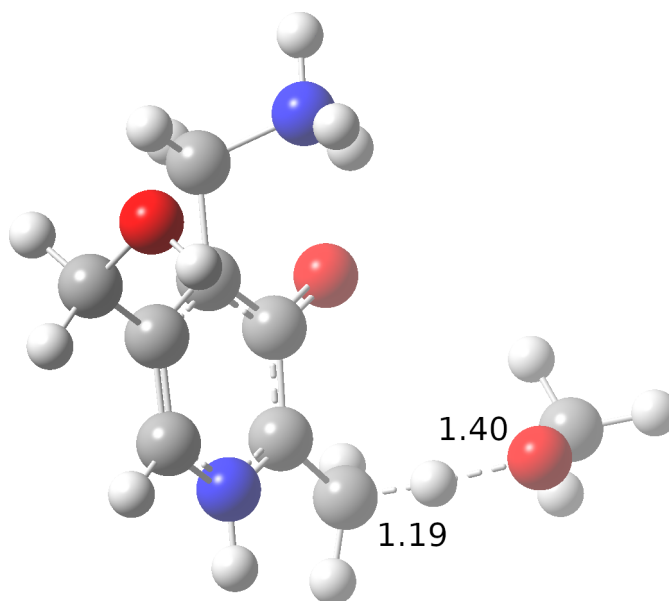

TS-H<sub>2</sub>PM(+)(-H,C7)(OCH<sub>3</sub>)<sup>+</sup>•

Charge=1, Multiplicity=2

|   |           |           |           |
|---|-----------|-----------|-----------|
| C | 0.411735  | 0.442889  | -0.738922 |
| C | -0.957859 | 0.382559  | -0.441864 |
| C | -1.549078 | -0.865932 | -0.224747 |
| C | -0.768914 | -2.000423 | -0.312274 |
| N | 0.531956  | -1.897424 | -0.604121 |
| H | -1.153755 | -2.997379 | -0.163237 |
| C | -1.758355 | 1.659795  | -0.426754 |
| H | -2.012638 | 1.892413  | -1.462957 |
| H | -2.684551 | 1.525457  | 0.123665  |
| C | -3.010133 | -1.019613 | 0.118898  |
| H | -3.624326 | -0.438770 | -0.564387 |
| H | -3.290375 | -2.067961 | 0.026800  |
| O | 1.040302  | 1.604933  | -0.956685 |
| O | -3.295264 | -0.538581 | 1.431945  |
| H | -2.854048 | -1.113875 | 2.065322  |
| N | -0.954533 | 2.774592  | 0.103663  |
| H | -1.391622 | 3.653339  | -0.143638 |
| H | -0.920726 | 2.722207  | 1.115311  |
| C | 1.166435  | -0.731793 | -0.823700 |
| C | 2.598505  | -0.721495 | -1.108685 |
| H | 2.875873  | -0.000991 | -1.872341 |
| H | 3.158834  | -0.290314 | -0.127836 |
| H | 3.018099  | -1.709328 | -1.275064 |
| H | 1.077992  | -2.751927 | -0.673378 |
| H | 0.402701  | 2.324575  | -0.580665 |
| O | 3.627034  | 0.194975  | 1.042374  |
| C | 2.590859  | 0.025898  | 1.978354  |
| H | 3.014415  | 0.350610  | 2.936609  |
| H | 1.729511  | 0.660601  | 1.759081  |
| H | 2.296913  | -1.020773 | 2.077024  |

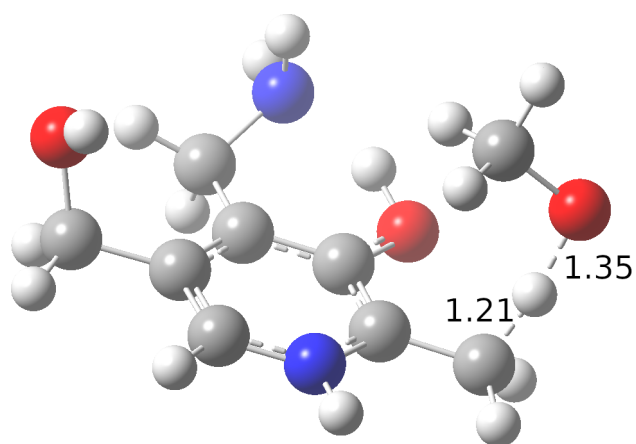

TS-H<sub>2</sub>PM(0)(-H,C7)(OCH<sub>3</sub>)<sup>+</sup>•

Charge=1, Multiplicity=2

|   |           |           |           |
|---|-----------|-----------|-----------|
| C | -0.528061 | -0.133524 | -0.873295 |
| C | 0.846613  | -0.137725 | -0.668134 |
| C | 1.428198  | 1.000066  | -0.107159 |
| C | 0.603888  | 2.075130  | 0.202655  |
| N | -0.709790 | 2.085780  | -0.006657 |
| H | 1.032398  | 2.966107  | 0.643861  |
| C | 1.646418  | -1.364092 | -1.003087 |
| H | 1.162114  | -1.956808 | -1.769798 |
| H | 2.651136  | -1.111483 | -1.326080 |
| C | 2.897519  | 1.059287  | 0.207335  |
| H | 3.493596  | 0.867259  | -0.682132 |
| H | 3.151761  | 2.046179  | 0.589845  |
| O | -1.099925 | -1.258656 | -1.378978 |
| O | 3.267686  | 0.049190  | 1.159990  |
| H | 2.921443  | 0.311119  | 2.020132  |
| N | 1.785257  | -2.224288 | 0.213933  |
| H | 2.286919  | -3.084639 | -0.007577 |
| H | 2.315547  | -1.697829 | 0.918671  |
| C | -1.283563 | 1.006301  | -0.545987 |
| C | -2.741966 | 1.012322  | -0.757574 |
| H | -3.061528 | 0.639292  | -1.730435 |
| H | -3.234310 | 0.223752  | 0.006844  |
| H | -3.193506 | 1.968993  | -0.517407 |
| H | -2.063093 | -1.201979 | -1.364801 |
| H | 0.869823  | -2.470777 | 0.592951  |
| O | -3.585385 | -0.752460 | 0.905782  |
| C | -2.501402 | -0.865307 | 1.795557  |
| H | -2.869689 | -1.480130 | 2.625686  |
| H | -1.644585 | -1.373329 | 1.347599  |
| H | -2.211155 | 0.104490  | 2.205488  |

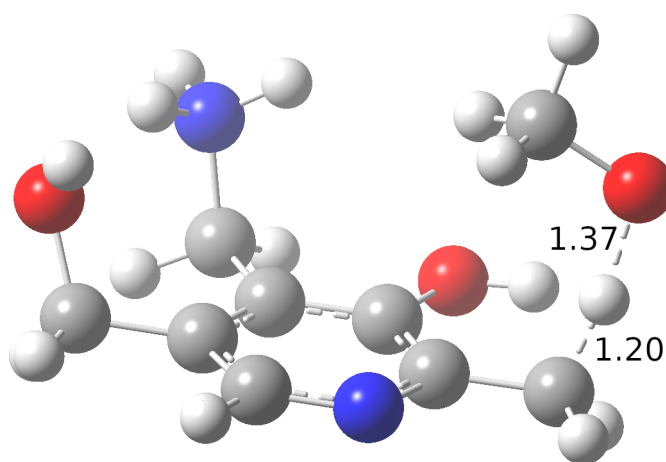



TS-H<sub>2</sub>PM(±)(-H,C8)(OCH<sub>3</sub>)<sup>+</sup>•

Charge=1, Multiplicity=2

|   |           |           |           |
|---|-----------|-----------|-----------|
| C | -0.952181 | -0.984604 | 0.207011  |
| C | -0.086514 | 0.141945  | 0.156116  |
| C | -0.550475 | 1.391437  | -0.291933 |
| C | -1.868080 | 1.523314  | -0.644820 |
| N | -2.683086 | 0.447632  | -0.567946 |
| H | -2.313924 | 2.444303  | -0.983573 |
| C | 1.332802  | -0.060619 | 0.493935  |
| H | 1.829673  | -0.668140 | -0.418528 |
| H | 1.924888  | 0.838621  | 0.607553  |
| C | 0.341988  | 2.605218  | -0.357164 |
| H | 1.252436  | 2.384722  | -0.909906 |
| H | -0.182947 | 3.409424  | -0.871126 |
| O | -0.563238 | -2.153863 | 0.562350  |
| O | 0.751430  | 3.027684  | 0.944852  |
| H | -0.031417 | 3.319272  | 1.423661  |
| N | 1.535337  | -0.941759 | 1.668212  |
| H | 2.502655  | -1.264308 | 1.713610  |
| H | 1.314670  | -0.449012 | 2.535137  |
| C | -2.311772 | -0.765497 | -0.172079 |
| C | -3.301636 | -1.870008 | -0.148299 |
| H | -2.964830 | -2.676939 | -0.800290 |
| H | -3.375236 | -2.275687 | 0.861492  |
| H | -4.280825 | -1.526139 | -0.474977 |
| H | 0.890231  | -1.745541 | 1.549910  |
| H | -3.655730 | 0.574117  | -0.833351 |
| O | 2.675158  | -1.368063 | -1.202552 |
| C | 3.949426  | -0.799164 | -1.008372 |
| H | 3.984367  | 0.242428  | -1.329883 |
| H | 4.285143  | -0.902754 | 0.026263  |
| H | 4.626945  | -1.383679 | -1.641438 |

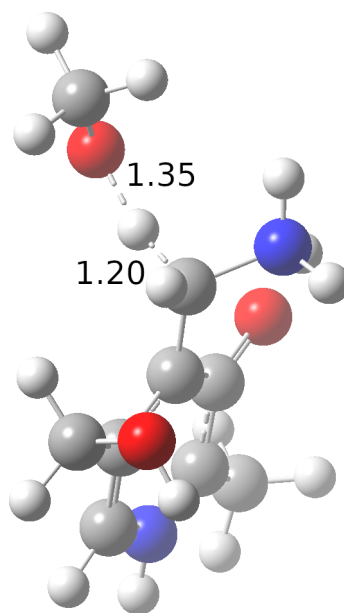

TS-H<sub>2</sub>PM(+)(-H,C8)(OCH<sub>3</sub>)<sup>+</sup>•

Charge=1, Multiplicity=2

|   |           |           |           |
|---|-----------|-----------|-----------|
| C | -0.327552 | -1.049998 | 0.315970  |
| C | -0.112720 | 0.323723  | 0.154468  |
| C | -1.154820 | 1.121524  | -0.347858 |
| C | -2.354345 | 0.527023  | -0.652582 |
| N | -2.508775 | -0.797249 | -0.482465 |
| H | -3.206256 | 1.066137  | -1.036352 |
| C | 1.238195  | 0.877422  | 0.431949  |
| H | 1.873491  | 0.544651  | -0.529656 |
| H | 1.285990  | 1.961873  | 0.403836  |
| C | -1.003025 | 2.608449  | -0.550116 |
| H | -0.121307 | 2.820515  | -1.150436 |
| H | -1.876782 | 2.988041  | -1.078241 |
| O | 0.630471  | -1.886908 | 0.755585  |
| O | -0.827854 | 3.294931  | 0.688103  |
| H | -1.640826 | 3.209891  | 1.196551  |
| N | 1.875630  | 0.262324  | 1.580639  |
| H | 2.838407  | 0.569644  | 1.647855  |
| H | 1.398388  | 0.544194  | 2.431968  |
| C | -1.560084 | -1.614750 | -0.013683 |
| C | -1.833157 | -3.067010 | 0.127486  |
| H | -1.150660 | -3.632742 | -0.507369 |
| H | -1.658365 | -3.373193 | 1.158801  |
| H | -2.859047 | -3.295081 | -0.151077 |
| H | -3.405271 | -1.209129 | -0.726218 |
| H | 1.346412  | -1.312207 | 1.160601  |
| O | 2.688275  | -0.003280 | -1.489285 |
| C | 3.717440  | -0.685297 | -0.815744 |
| H | 3.339785  | -1.528733 | -0.236339 |
| H | 4.365207  | -1.079607 | -1.608924 |
| H | 4.316130  | -0.014252 | -0.196781 |

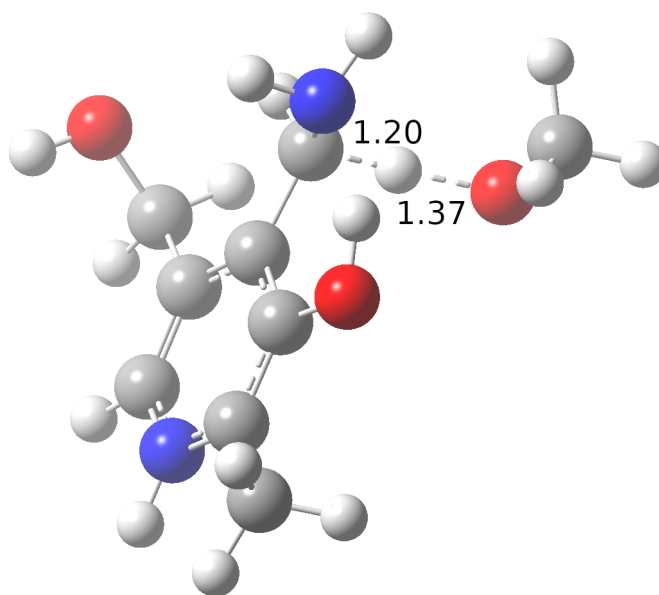

TS-H<sub>2</sub>PM(0)(-H,C8)(OCH<sub>3</sub>)<sup>+</sup>•

Charge=1, Multiplicity=2

|   |           |           |           |
|---|-----------|-----------|-----------|
| C | -0.296674 | -1.062314 | 0.198135  |
| C | -0.191592 | 0.309275  | -0.001346 |
| C | -1.339983 | 1.004187  | -0.405778 |
| C | -2.504687 | 0.276947  | -0.573555 |
| N | -2.600080 | -1.043086 | -0.378298 |
| H | -3.411226 | 0.784868  | -0.877274 |
| C | 1.115555  | 0.981719  | 0.165998  |
| H | 1.889150  | 0.481622  | -0.662353 |
| H | 1.123435  | 2.040563  | -0.054814 |
| C | -1.349788 | 2.496225  | -0.600561 |
| H | -0.577086 | 2.806219  | -1.300607 |
| H | -2.316584 | 2.797201  | -1.002751 |
| O | 0.831228  | -1.729080 | 0.566469  |
| O | -1.078604 | 3.189036  | 0.622452  |
| H | -1.789736 | 2.990679  | 1.240158  |
| N | 1.743525  | 0.758291  | 1.489531  |
| H | 2.671493  | 1.185191  | 1.524561  |
| H | 1.173834  | 1.178078  | 2.229574  |
| C | -1.522273 | -1.716391 | 0.008806  |
| C | -1.621764 | -3.192512 | 0.233758  |
| H | -0.962589 | -3.735250 | -0.447886 |
| H | -1.335279 | -3.452322 | 1.255525  |
| H | -2.643966 | -3.518223 | 0.063779  |
| H | 0.657899  | -2.667807 | 0.710379  |
| H | 1.836344  | -0.243584 | 1.682286  |
| O | 2.784595  | -0.062858 | -1.398329 |
| C | 3.860353  | -0.451572 | -0.572667 |
| H | 3.560665  | -1.201712 | 0.161035  |
| H | 4.590934  | -0.907873 | -1.249395 |
| H | 4.335967  | 0.405737  | -0.092324 |

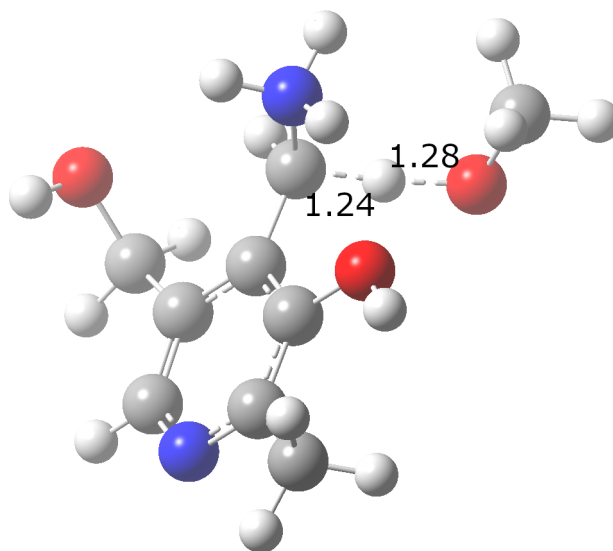

TS-H<sub>2</sub>PM(±)(-H,C9)(OCH<sub>3</sub>)<sup>+</sup>•

Charge=1, Multiplicity=2

|   |           |           |           |
|---|-----------|-----------|-----------|
| C | 1.522139  | 0.504886  | -0.282322 |
| C | 0.140346  | 0.475280  | 0.027986  |
| C | -0.440498 | -0.633896 | 0.649372  |
| C | 0.336363  | -1.742052 | 0.904839  |
| N | 1.638601  | -1.712396 | 0.565591  |
| H | -0.026731 | -2.642868 | 1.371730  |
| C | -0.648076 | 1.678889  | -0.391685 |
| H | -0.526050 | 1.840545  | -1.460975 |
| H | -1.700098 | 1.611366  | -0.149799 |
| C | -1.878679 | -0.669273 | 1.042135  |
| H | -2.524249 | -0.555893 | 0.058625  |
| H | -2.166040 | -1.636375 | 1.452984  |
| O | 2.088130  | 1.529547  | -0.808587 |
| O | -2.182911 | 0.393922  | 1.909657  |
| H | -3.085269 | 0.280310  | 2.228180  |
| N | -0.093837 | 2.894660  | 0.281266  |
| H | -0.548658 | 3.740251  | -0.062380 |
| H | -0.221014 | 2.841241  | 1.292105  |
| C | 2.264858  | -0.675856 | 0.007073  |
| C | 3.708919  | -0.773055 | -0.319962 |
| H | 3.852340  | -0.618479 | -1.390410 |
| H | 4.255741  | 0.016157  | 0.197589  |
| H | 4.115841  | -1.741836 | -0.036965 |
| H | 0.910224  | 2.933735  | 0.063158  |
| H | 2.192172  | -2.541708 | 0.760331  |
| O | -3.130794 | -0.536000 | -1.222904 |
| C | -2.242388 | -1.256937 | -2.040837 |
| H | -2.036862 | -2.250420 | -1.635163 |
| H | -2.763379 | -1.387791 | -2.996964 |
| H | -1.314611 | -0.711747 | -2.224965 |

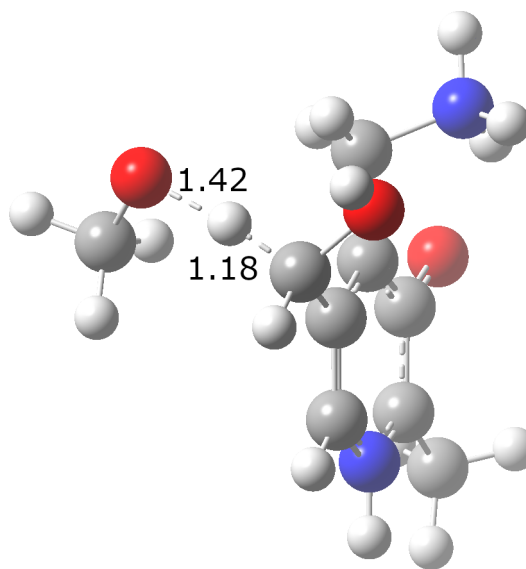

TS-H<sub>2</sub>PM(+)(-H,C9)(OCH<sub>3</sub>)<sup>+</sup>•

Charge=1, Multiplicity=2

|   |           |           |           |
|---|-----------|-----------|-----------|
| C | 1.501172  | 0.458684  | -0.155472 |
| C | 0.136342  | 0.467178  | 0.146635  |
| C | -0.467799 | -0.725287 | 0.571195  |
| C | 0.289207  | -1.872793 | 0.633433  |
| N | 1.589740  | -1.829953 | 0.308750  |
| H | -0.102889 | -2.830091 | 0.938528  |
| C | -0.639094 | 1.741433  | -0.069644 |
| H | -0.788832 | 1.841529  | -1.147224 |
| H | -1.614928 | 1.685473  | 0.401398  |
| C | -1.910122 | -0.810897 | 0.947907  |
| H | -2.552684 | -0.459609 | 0.016642  |
| H | -2.221271 | -1.840898 | 1.117746  |
| O | 2.144418  | 1.570372  | -0.558948 |
| O | -2.192733 | 0.021350  | 2.042293  |
| H | -3.092823 | -0.157404 | 2.336905  |
| N | 0.146152  | 2.901594  | 0.384843  |
| H | -0.281651 | 3.751343  | 0.038832  |
| H | 0.137438  | 2.945034  | 1.397443  |
| C | 2.239313  | -0.721606 | -0.069750 |
| C | 3.686728  | -0.782167 | -0.393852 |
| H | 3.842500  | -0.501889 | -1.435973 |
| H | 4.227997  | -0.068092 | 0.226810  |
| H | 4.080837  | -1.781912 | -0.226314 |
| H | 2.123723  | -2.693063 | 0.365903  |
| H | 1.544975  | 2.342741  | -0.270835 |
| O | -3.189905 | -0.196528 | -1.210920 |
| C | -2.348319 | -0.775108 | -2.178673 |
| H | -1.407049 | -0.232749 | -2.285735 |
| H | -2.167239 | -1.833184 | -1.974540 |
| H | -2.898167 | -0.706894 | -3.124819 |

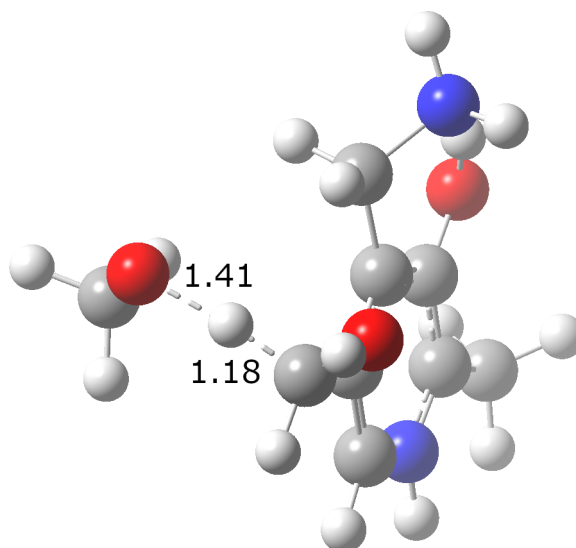

TS-H<sub>2</sub>PM(0)(-H,C9)(OCH<sub>3</sub>)<sup>+</sup>•

Charge=1, Multiplicity=2

|   |           |           |           |
|---|-----------|-----------|-----------|
| C | 1.740453  | 0.534207  | -0.269902 |
| C | 0.376110  | 0.385641  | -0.069067 |
| C | -0.090762 | -0.875807 | 0.318036  |
| C | 0.825966  | -1.908809 | 0.435195  |
| N | 2.133471  | -1.764967 | 0.208271  |
| H | 0.490256  | -2.894825 | 0.729104  |
| C | -0.540543 | 1.556228  | -0.282755 |
| H | -0.118135 | 2.255429  | -0.995095 |
| H | -1.517344 | 1.236470  | -0.629203 |
| C | -1.528810 | -1.138751 | 0.592519  |
| H | -2.107492 | -1.035990 | -0.429797 |
| H | -1.704571 | -2.164080 | 0.914398  |
| O | 2.206951  | 1.770666  | -0.604512 |
| O | -2.046711 | -0.199076 | 1.504261  |
| H | -2.945167 | -0.451983 | 1.746490  |
| N | -0.754046 | 2.299557  | 0.998299  |
| H | -1.353211 | 3.110976  | 0.843010  |
| H | -1.211144 | 1.675187  | 1.669413  |
| C | 2.600096  | -0.568142 | -0.135375 |
| C | 4.067390  | -0.407401 | -0.382700 |
| H | 4.255082  | -0.050057 | -1.397966 |
| H | 4.504254  | 0.313759  | 0.312205  |
| H | 4.565381  | -1.363894 | -0.253309 |
| H | 3.159344  | 1.751269  | -0.755251 |
| H | 0.131429  | 2.624436  | 1.389164  |
| O | -2.995929 | -0.760307 | -1.519494 |
| C | -4.098382 | -0.133924 | -0.914579 |
| H | -3.831600 | 0.826605  | -0.468132 |
| H | -4.810237 | 0.057703  | -1.727198 |
| H | -4.586415 | -0.782864 | -0.184081 |

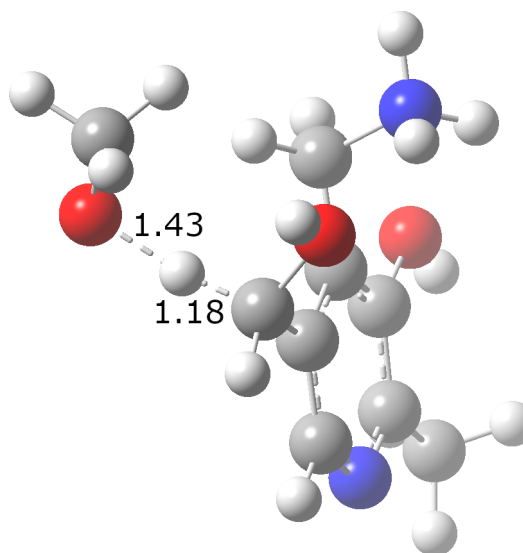

TS-H<sub>2</sub>PM(+)(-H,N2)(OCH<sub>3</sub>)<sup>+</sup>•

Charge=1, Multiplicity=2

|   |           |           |           |
|---|-----------|-----------|-----------|
| C | -1.359673 | -0.927613 | -0.137727 |
| C | -0.309986 | -0.021703 | -0.278677 |
| C | -0.583974 | 1.351477  | -0.240650 |
| C | -1.886408 | 1.762192  | -0.077882 |
| N | -2.861447 | 0.849450  | 0.037822  |
| H | -2.186983 | 2.797349  | -0.038484 |
| C | 1.094674  | -0.546540 | -0.441762 |
| H | 1.073834  | -1.460238 | -1.028606 |
| H | 1.688460  | 0.198203  | -0.974627 |
| C | 0.500901  | 2.389898  | -0.370861 |
| H | 1.013389  | 2.278189  | -1.324001 |
| H | 0.053316  | 3.382112  | -0.335256 |
| O | -1.075261 | -2.249059 | -0.164127 |
| O | 1.496072  | 2.248214  | 0.640474  |
| H | 1.098807  | 2.466962  | 1.490011  |
| N | 1.642904  | -0.837689 | 0.877587  |
| H | 2.662709  | -1.308813 | 0.773297  |
| H | 1.780621  | 0.053577  | 1.352664  |
| C | -2.669540 | -0.475611 | 0.019625  |
| C | -3.833417 | -1.388628 | 0.171829  |
| H | -3.902982 | -2.050603 | -0.693508 |
| H | -3.706267 | -2.003447 | 1.064583  |
| H | -4.758363 | -0.824924 | 0.258312  |
| H | -3.814480 | 1.183978  | 0.153116  |
| H | -1.873239 | -2.788786 | -0.103609 |
| O | 3.930555  | -1.346535 | 0.469494  |
| C | 4.276637  | -0.524171 | -0.619547 |
| H | 4.095041  | 0.531900  | -0.403510 |
| H | 5.353814  | -0.653868 | -0.773038 |
| H | 3.765912  | -0.820686 | -1.538023 |

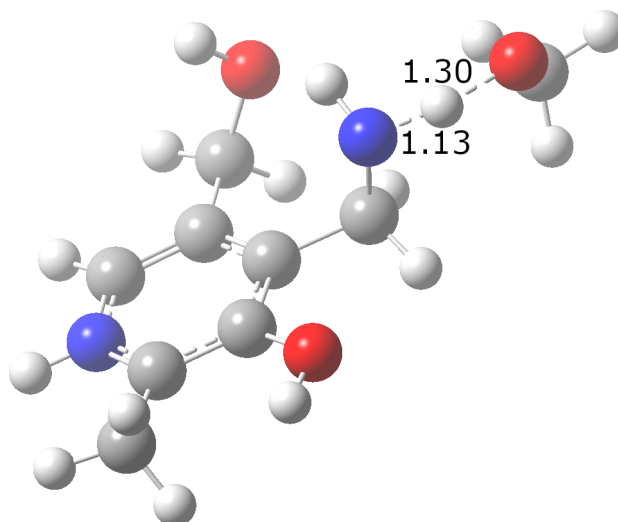

TS-H<sub>2</sub>PM(+)(-H,O<sub>2</sub>)(OCH<sub>3</sub>)<sup>+</sup>•

Charge=1, Multiplicity=2

|   |           |           |           |
|---|-----------|-----------|-----------|
| C | -1.825805 | 0.578519  | 0.211302  |
| C | -0.453810 | 0.415044  | 0.025907  |
| C | 0.025914  | -0.850450 | -0.329673 |
| C | -0.858852 | -1.897214 | -0.446840 |
| N | -2.165756 | -1.683843 | -0.243546 |
| H | -0.566664 | -2.903194 | -0.704012 |
| C | 0.440863  | 1.615937  | 0.173345  |
| H | 0.164985  | 2.133962  | 1.094020  |
| H | 1.471751  | 1.295414  | 0.274395  |
| C | 1.492045  | -1.121619 | -0.559487 |
| H | 1.618502  | -2.072179 | -1.075218 |
| H | 1.924892  | -0.319589 | -1.162245 |
| O | -2.276963 | 1.815058  | 0.527228  |
| O | 2.094006  | -1.151189 | 0.719154  |
| H | 3.281032  | -1.091819 | 0.638127  |
| N | 0.327172  | 2.464752  | -1.020900 |
| H | 1.026288  | 3.194764  | -0.954042 |
| C | -2.699430 | -0.497828 | 0.081558  |
| C | -4.167456 | -0.387970 | 0.289725  |
| H | -4.372185 | -0.043666 | 1.304994  |
| H | -4.590489 | 0.335025  | -0.409864 |
| H | -4.650469 | -1.350095 | 0.139203  |
| H | -3.235432 | 1.830444  | 0.640467  |
| H | -0.572875 | 2.929590  | -1.009304 |
| O | 4.306172  | -0.769264 | 0.297182  |
| C | 4.367038  | 0.634148  | 0.170407  |
| H | 5.415566  | 0.862576  | -0.046029 |
| H | 3.772006  | 0.982574  | -0.677551 |
| H | 4.073181  | 1.135004  | 1.092054  |
| H | -2.798758 | -2.473407 | -0.339851 |

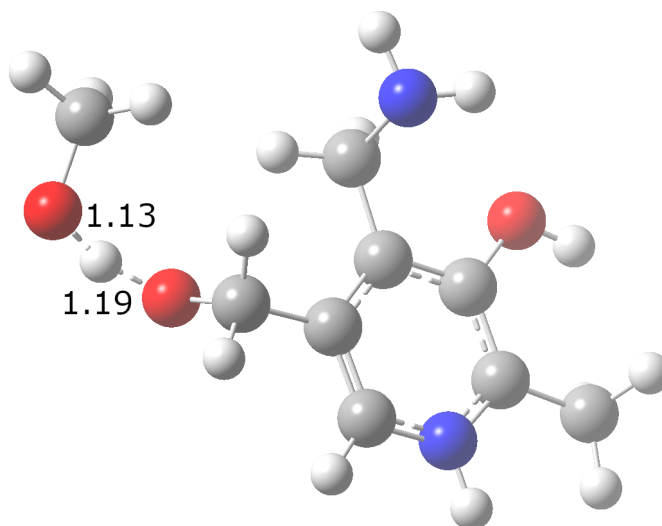



TS-H<sub>2</sub>PM(0)(-H,O<sub>2</sub>)(OCH<sub>3</sub>)<sup>+</sup>•

Charge=1, Multiplicity=2

|   |           |           |           |
|---|-----------|-----------|-----------|
| C | 1.681716  | 0.415129  | -0.037594 |
| C | 0.465813  | 0.989496  | -0.427148 |
| C | -0.504299 | 0.135273  | -0.903265 |
| C | -0.245379 | -1.267057 | -0.895149 |
| N | 0.937281  | -1.813450 | -0.556002 |
| H | -0.956688 | -1.924510 | -1.373056 |
| C | 0.193851  | 2.455287  | -0.236891 |
| H | 1.092932  | 3.002409  | 0.018624  |
| H | -0.241243 | 2.884775  | -1.134002 |
| C | -1.926873 | 0.587644  | -1.122450 |
| H | -1.956421 | 1.536796  | -1.659928 |
| H | -2.457660 | -0.158026 | -1.718264 |
| O | 2.635909  | 1.206548  | 0.424176  |
| O | -2.498127 | 0.718251  | 0.173499  |
| H | -2.062373 | -0.393306 | 0.689663  |
| N | -0.801870 | 2.625902  | 0.867176  |
| H | -1.145718 | 3.584538  | 0.889241  |
| H | -1.613973 | 1.934667  | 0.714587  |
| C | 1.883740  | -1.013226 | -0.124128 |
| C | 3.193466  | -1.582538 | 0.290895  |
| H | 4.008755  | -1.137354 | -0.284590 |
| H | 3.375884  | -1.376161 | 1.349242  |
| H | 3.188300  | -2.656178 | 0.133294  |
| H | 3.435126  | 0.721783  | 0.677642  |
| H | -0.369554 | 2.422282  | 1.767455  |
| O | -1.527649 | -1.367570 | 0.912491  |
| C | -2.429830 | -2.449986 | 0.724951  |
| H | -1.868322 | -3.376562 | 0.611093  |
| H | -3.076636 | -2.537484 | 1.601483  |
| H | -3.054577 | -2.292797 | -0.157352 |

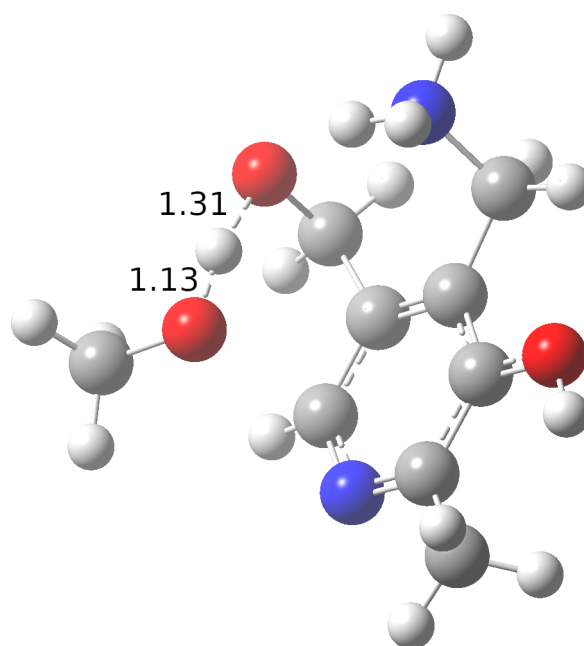

TS-H<sub>2</sub>PM(±)(OOH,C2)<sup>+</sup>•

Charge=1, Multiplicity=2

|   |           |           |           |
|---|-----------|-----------|-----------|
| C | -0.933318 | 0.690547  | -0.556703 |
| C | 0.480373  | 0.789564  | -0.391358 |
| C | 1.274169  | -0.346760 | -0.331158 |
| C | 0.675821  | -1.593454 | -0.468497 |
| N | -0.650266 | -1.683806 | -0.656108 |
| H | 1.226340  | -2.517944 | -0.474692 |
| C | 1.049635  | 2.175832  | -0.342443 |
| H | 2.113348  | 2.192740  | -0.138203 |
| H | 0.856957  | 2.700521  | -1.275890 |
| C | 2.765181  | -0.253263 | -0.147125 |
| H | 3.196553  | 0.300539  | -0.983567 |
| H | 2.978860  | 0.293131  | 0.773905  |
| O | -1.679953 | 1.702669  | -0.651194 |
| O | 3.315277  | -1.561287 | -0.083895 |
| H | 4.268905  | -1.475803 | 0.005492  |
| C | -1.502587 | -0.646813 | -0.568555 |
| H | -1.049601 | -2.611012 | -0.760086 |
| N | 0.373361  | 2.963504  | 0.734326  |
| H | 0.533916  | 2.544258  | 1.650360  |
| H | 0.716356  | 3.923796  | 0.749915  |
| H | -0.634791 | 2.964300  | 0.541857  |
| O | -1.792009 | -0.575649 | 1.475674  |
| C | -2.927247 | -0.854448 | -0.933847 |
| H | -3.216834 | -1.888707 | -0.759911 |
| H | -3.072588 | -0.610149 | -1.987780 |
| H | -3.556259 | -0.194909 | -0.340510 |
| O | -0.701923 | -1.101501 | 2.105867  |
| H | -0.846112 | -2.059734 | 2.118093  |

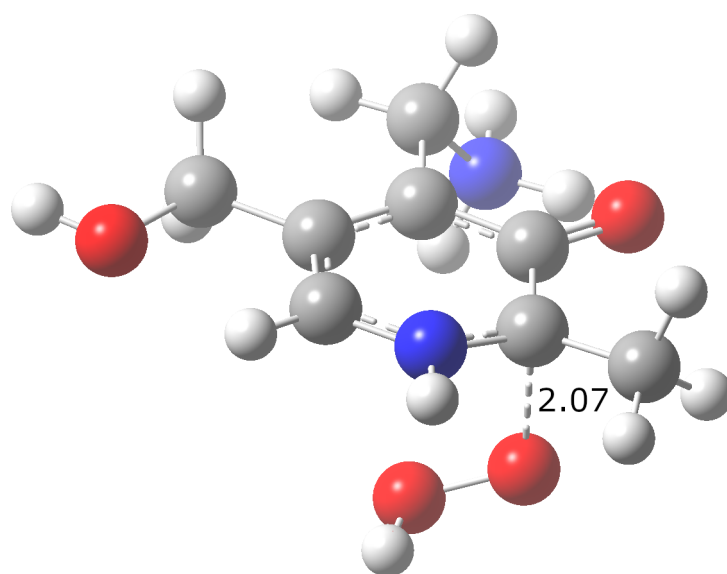

TS-H<sub>2</sub>PM(±)(OOH,C4)<sup>+</sup>•

Charge=1, Multiplicity=2

|   |           |           |           |
|---|-----------|-----------|-----------|
| C | -0.509585 | 1.595809  | 0.705781  |
| C | -1.020253 | 0.382280  | 0.369261  |
| C | 1.292370  | -0.460160 | 0.124793  |
| C | 1.748071  | 0.858286  | 0.458624  |
| N | 0.843643  | 1.791761  | 0.720335  |
| H | -1.107364 | 2.447178  | 0.981941  |
| C | 3.193951  | 1.165185  | 0.561893  |
| H | 3.695836  | 0.881031  | -0.363287 |
| H | 3.356410  | 2.222466  | 0.758813  |
| H | 3.635035  | 0.575505  | 1.367164  |
| C | -2.501859 | 0.151229  | 0.320420  |
| H | -2.786692 | -0.088468 | -0.707920 |
| H | -2.761913 | -0.699400 | 0.955294  |
| O | -3.177900 | 1.319584  | 0.763010  |
| H | -4.123110 | 1.150844  | 0.710021  |
| C | -0.130401 | -0.632522 | -0.073343 |
| C | -0.579519 | -2.050961 | -0.279839 |
| H | -1.639181 | -2.128923 | -0.492079 |
| H | -0.013792 | -2.506056 | -1.086208 |
| O | 2.107375  | -1.410862 | -0.023521 |
| O | -0.121773 | -0.333158 | -2.059077 |
| H | 1.179575  | 2.716843  | 0.969240  |
| N | -0.295017 | -2.854548 | 0.948791  |
| H | -0.575831 | -3.826545 | 0.813787  |
| H | 0.708722  | -2.833776 | 1.146442  |
| H | -0.796982 | -2.483673 | 1.756991  |
| O | -0.323870 | 0.995815  | -2.339606 |
| H | 0.561600  | 1.386581  | -2.346072 |

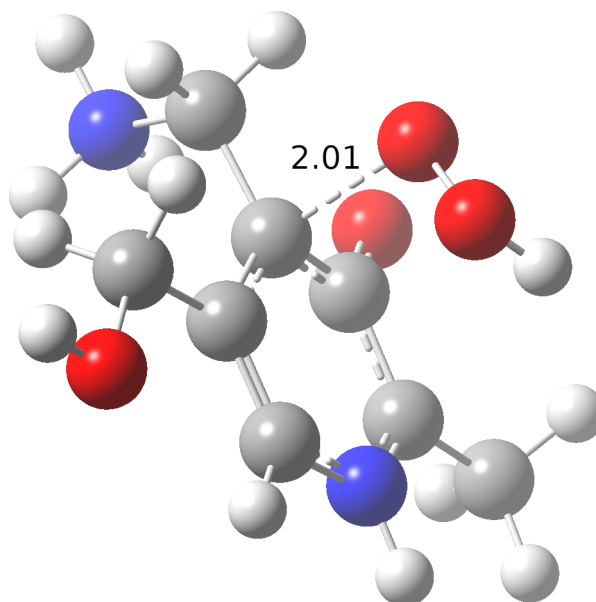

TS-H<sub>2</sub>PM(±)(OOH,C6)<sup>+</sup>•

Charge=1, Multiplicity=2

|   |           |           |           |
|---|-----------|-----------|-----------|
| C | -0.380987 | -1.527815 | -0.830498 |
| C | 0.653365  | -0.569176 | -0.833348 |
| C | -0.976943 | 1.137983  | -0.189166 |
| C | -2.002482 | 0.141841  | -0.338735 |
| N | -1.657895 | -1.089513 | -0.711295 |
| C | -3.428801 | 0.476343  | -0.117175 |
| H | -3.714942 | 1.308373  | -0.761643 |
| H | -4.068675 | -0.379802 | -0.318839 |
| H | -3.570329 | 0.801170  | 0.914760  |
| C | 2.058621  | -1.047354 | -1.062209 |
| H | 2.059128  | -2.124070 | -1.225311 |
| H | 2.484147  | -0.556646 | -1.939284 |
| O | 2.829598  | -0.720832 | 0.101921  |
| H | 3.754113  | -0.913035 | -0.086424 |
| C | 0.364649  | 0.735152  | -0.521588 |
| C | 1.423055  | 1.793902  | -0.462310 |
| H | 2.259649  | 1.572028  | -1.115699 |
| H | 1.007310  | 2.763842  | -0.711930 |
| O | -1.269929 | 2.302081  | 0.195601  |
| H | -2.399553 | -1.774868 | -0.817606 |
| N | 1.966531  | 1.885166  | 0.929349  |
| H | 2.669731  | 2.621152  | 0.996467  |
| H | 1.221805  | 2.087502  | 1.597855  |
| H | 2.400788  | 0.986093  | 1.160976  |
| O | -0.039469 | -2.240168 | 1.061994  |
| H | -0.251758 | -2.516395 | -1.238543 |
| O | -0.388512 | -1.209479 | 1.897712  |
| H | -1.328230 | -1.342991 | 2.091185  |

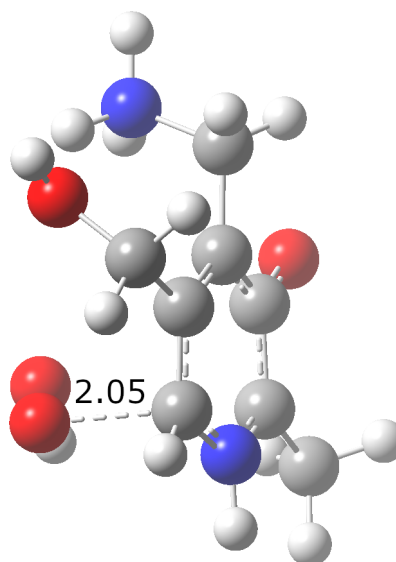

TS-H<sub>2</sub>PM(±)(OOCH<sub>3</sub>,C2)<sup>+</sup>•

Charge=1, Multiplicity=2

|   |           |           |           |
|---|-----------|-----------|-----------|
| C | -0.332244 | 1.279379  | -0.540923 |
| C | 0.968451  | 0.752889  | -0.286132 |
| C | 1.237014  | -0.598321 | -0.453751 |
| C | 0.228416  | -1.431385 | -0.921927 |
| N | -0.983518 | -0.925963 | -1.202645 |
| H | 0.370734  | -2.479092 | -1.122683 |
| C | 2.014214  | 1.741732  | 0.133433  |
| H | 2.962505  | 1.280204  | 0.380705  |
| H | 2.170625  | 2.487177  | -0.643212 |
| C | 2.600496  | -1.168226 | -0.167464 |
| H | 3.334011  | -0.692132 | -0.821364 |
| H | 2.869404  | -0.950046 | 0.868110  |
| O | -0.606307 | 2.502753  | -0.421844 |
| O | 2.580818  | -2.571469 | -0.386767 |
| H | 3.457377  | -2.911703 | -0.186268 |
| C | -1.374843 | 0.324436  | -0.895040 |
| H | -1.690257 | -1.561257 | -1.558149 |
| N | 1.547480  | 2.482537  | 1.347006  |
| H | 1.416516  | 1.848160  | 2.135340  |
| H | 2.221446  | 3.199328  | 1.616055  |
| H | 0.649892  | 2.927995  | 1.126631  |
| O | -1.869894 | 0.123942  | 1.078513  |
| C | -2.696757 | 0.800184  | -1.379349 |
| H | -3.392418 | -0.033294 | -1.459710 |
| H | -2.578223 | 1.270033  | -2.357552 |
| H | -3.093707 | 1.541378  | -0.689982 |
| O | -1.225308 | -0.967601 | 1.575735  |
| C | -2.105176 | -2.099175 | 1.555078  |
| H | -2.477983 | -2.265896 | 0.546091  |
| H | -1.505837 | -2.943023 | 1.887469  |
| H | -2.933716 | -1.923934 | 2.239348  |

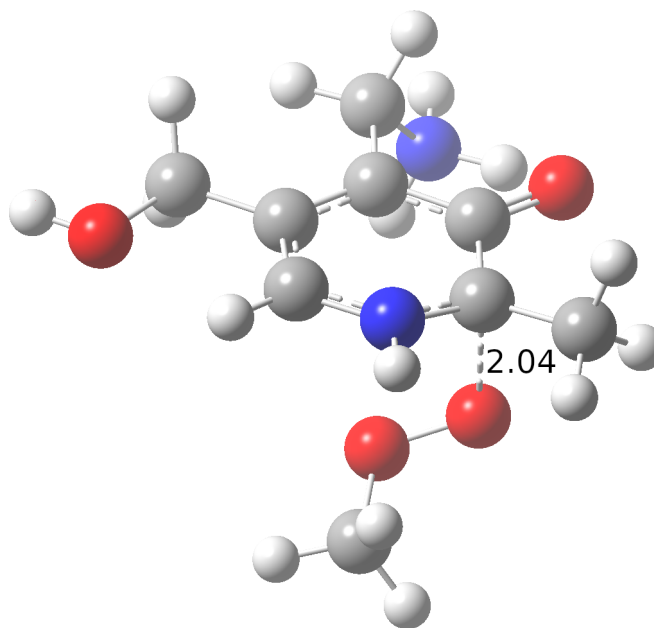

TS-H<sub>2</sub>PM(±)(OOCH<sub>3</sub>,C6)<sup>+</sup>•

Charge=1, Multiplicity=2

|   |           |           |           |
|---|-----------|-----------|-----------|
| C | -0.302833 | 1.243874  | -0.992245 |
| C | -1.159682 | 0.174569  | -0.632950 |
| C | 0.807521  | -1.264430 | -0.433181 |
| C | 1.606789  | -0.173429 | -0.901130 |
| N | 1.000273  | 0.966974  | -1.232160 |
| C | 3.075463  | -0.298624 | -1.046763 |
| H | 3.524134  | -0.454090 | -0.063344 |
| H | 3.316763  | -1.168485 | -1.657938 |
| H | 3.501384  | 0.594957  | -1.497298 |
| C | -2.632156 | 0.470315  | -0.458839 |
| H | -3.203657 | -0.042655 | -1.230854 |
| H | -2.959736 | 0.097067  | 0.512615  |
| O | -2.930941 | 1.851806  | -0.577223 |
| H | -2.547356 | 2.307050  | 0.180908  |
| C | -0.613428 | -1.051255 | -0.362550 |
| C | -1.432731 | -2.240888 | 0.039443  |
| H | -2.496093 | -2.037442 | 0.070792  |
| H | -1.247451 | -3.071775 | -0.636908 |
| O | 1.340105  | -2.364326 | -0.102783 |
| H | 1.580842  | 1.724956  | -1.578053 |
| N | -1.016756 | -2.701622 | 1.400712  |
| H | -1.537529 | -3.534588 | 1.675104  |
| H | -0.015505 | -2.921475 | 1.373980  |
| H | -1.177546 | -1.974270 | 2.098358  |
| O | -0.234786 | 2.062701  | 0.861820  |
| H | -0.677108 | 2.159215  | -1.415839 |
| O | 0.595586  | 1.226669  | 1.564317  |
| C | 1.874048  | 1.852654  | 1.732959  |
| H | 1.767125  | 2.726840  | 2.373243  |
| H | 2.503794  | 1.105733  | 2.210796  |
| H | 2.285663  | 2.139977  | 0.767053  |

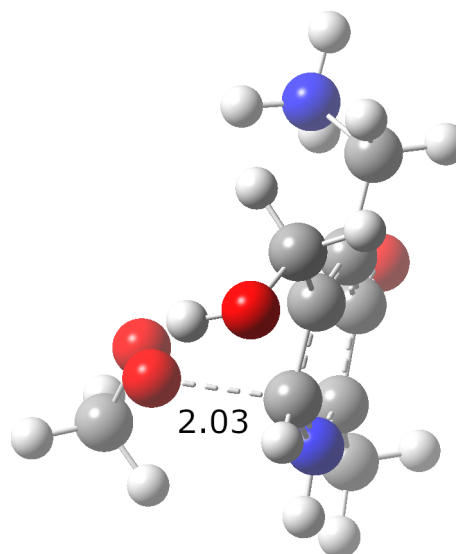

TS-H<sub>2</sub>PM(±)(OCH<sub>3</sub>,C2)<sup>+</sup>•

Charge=1, Multiplicity=2

|   |           |           |           |
|---|-----------|-----------|-----------|
| C | -0.973219 | 0.517224  | -0.666446 |
| C | 0.425418  | 0.734070  | -0.485147 |
| C | 1.308829  | -0.327689 | -0.347216 |
| C | 0.810095  | -1.621940 | -0.388648 |
| N | -0.507252 | -1.819915 | -0.546488 |
| H | 1.425172  | -2.502802 | -0.316640 |
| C | 0.878943  | 2.163850  | -0.487870 |
| H | 1.927769  | 2.280156  | -0.243624 |
| H | 0.684003  | 2.624192  | -1.454303 |
| C | 2.793108  | -0.104769 | -0.156017 |
| H | 3.188516  | 0.433623  | -1.015606 |
| H | 2.952299  | 0.509479  | 0.731851  |
| O | -1.791051 | 1.469334  | -0.848399 |
| O | 3.527695  | -1.313310 | -0.061228 |
| H | 3.370141  | -1.708913 | 0.802177  |
| C | -1.429180 | -0.847617 | -0.606786 |
| H | -0.840963 | -2.778824 | -0.574190 |
| N | 0.089843  | 2.936641  | 0.520351  |
| H | 0.246476  | 2.575075  | 1.461635  |
| H | 0.342886  | 3.924262  | 0.501699  |
| H | -0.905282 | 2.828867  | 0.284897  |
| O | -1.818443 | -0.519547 | 1.577724  |
| C | -0.669150 | -0.551736 | 2.362043  |
| H | -0.129434 | 0.399142  | 2.372064  |
| H | -0.977938 | -0.805990 | 3.385542  |
| H | 0.005864  | -1.361877 | 2.050392  |
| C | -2.836340 | -1.205267 | -0.915064 |
| H | -3.044355 | -2.232142 | -0.619629 |
| H | -3.011074 | -1.100214 | -1.987961 |
| H | -3.508841 | -0.529680 | -0.393221 |

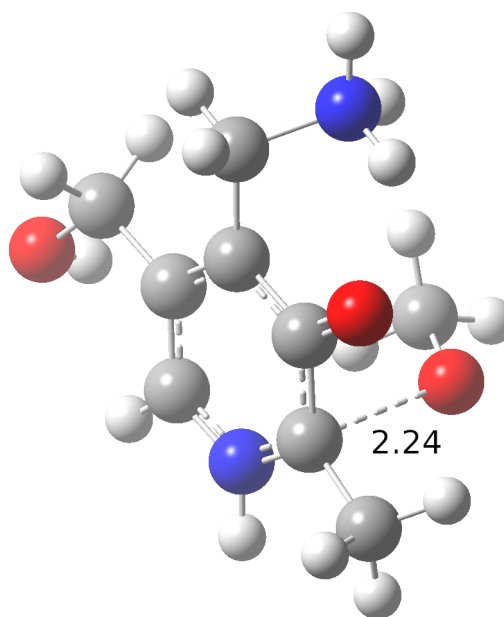

TS-H<sub>2</sub>PM(+)(OCH<sub>3</sub>,C2)<sup>+</sup>•

Charge=1, Multiplicity=2

|   |           |           |           |
|---|-----------|-----------|-----------|
| C | -0.886944 | 0.668217  | -0.600248 |
| C | 0.504553  | 0.711622  | -0.523633 |
| C | 1.197699  | -0.494868 | -0.373000 |
| C | 0.493696  | -1.689649 | -0.360739 |
| N | -0.833878 | -1.683730 | -0.484858 |
| H | 0.968745  | -2.653086 | -0.281396 |
| C | 1.238894  | 2.028642  | -0.556994 |
| H | 2.218850  | 1.877430  | -1.002044 |
| H | 0.714320  | 2.729726  | -1.211472 |
| C | 2.694556  | -0.513666 | -0.261219 |
| H | 3.124689  | -0.192903 | -1.213196 |
| H | 3.004109  | 0.190377  | 0.511943  |
| O | -1.674269 | 1.740857  | -0.732694 |
| O | 3.120556  | -1.829899 | 0.057003  |
| H | 4.081976  | -1.830775 | 0.083216  |
| C | -1.593573 | -0.563000 | -0.506353 |
| H | -1.321309 | -2.575235 | -0.496536 |
| N | 1.413790  | 2.530662  | 0.812521  |
| H | 1.890916  | 3.423145  | 0.766112  |
| H | 0.501332  | 2.710512  | 1.216558  |
| O | -2.007293 | -0.321342 | 1.453809  |
| C | -0.897784 | -0.374205 | 2.302678  |
| H | -0.311245 | 0.546118  | 2.289687  |
| H | -1.300012 | -0.527433 | 3.312714  |
| H | -0.261330 | -1.242969 | 2.094934  |
| C | -3.018971 | -0.690395 | -0.918769 |
| H | -3.409666 | -1.654908 | -0.601096 |
| H | -3.080273 | -0.616375 | -2.005514 |
| H | -3.607692 | 0.106244  | -0.475697 |
| H | -1.177499 | 2.568494  | -0.717137 |

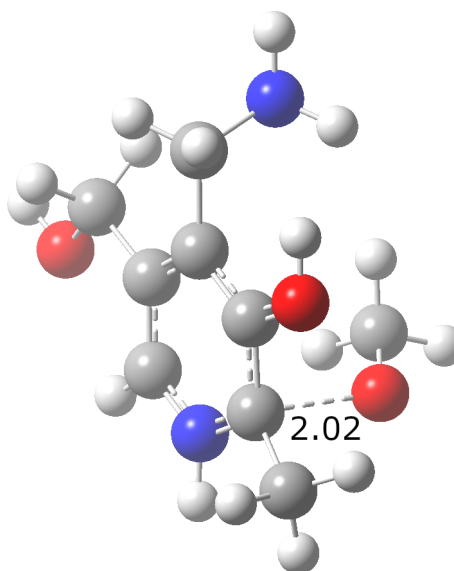



TS-H<sub>2</sub>PM(0)(OCH<sub>3</sub>,C2)<sup>+</sup>•

Charge=1, Multiplicity=2

|   |           |           |           |
|---|-----------|-----------|-----------|
| C | -0.917253 | 0.584761  | -0.629224 |
| C | 0.470254  | 0.652539  | -0.549131 |
| C | 1.163184  | -0.548590 | -0.370614 |
| C | 0.430406  | -1.744935 | -0.322937 |
| N | -0.883714 | -1.816621 | -0.428740 |
| H | 0.958683  | -2.681497 | -0.225490 |
| C | 1.201257  | 1.964997  | -0.647800 |
| H | 2.212676  | 1.830972  | -1.014651 |
| H | 0.705930  | 2.674014  | -1.305172 |
| C | 2.663297  | -0.569168 | -0.269802 |
| H | 3.092357  | -0.238357 | -1.219285 |
| H | 2.991765  | 0.121253  | 0.510226  |
| O | -1.727089 | 1.644547  | -0.810379 |
| O | 3.106065  | -1.884876 | 0.034076  |
| H | 4.066929  | -1.868210 | 0.069770  |
| C | -1.590425 | -0.668559 | -0.493833 |
| N | 1.308080  | 2.617800  | 0.699733  |
| H | 1.798511  | 3.510980  | 0.629082  |
| H | 0.381071  | 2.788908  | 1.094583  |
| O | -2.000698 | -0.327448 | 1.475912  |
| C | -0.869559 | -0.299586 | 2.296289  |
| H | -0.350748 | 0.663044  | 2.271898  |
| H | -1.207244 | -0.494770 | 3.321562  |
| H | -0.167277 | -1.105524 | 2.046704  |
| C | -3.031609 | -0.767180 | -0.882551 |
| H | -3.432880 | -1.713105 | -0.527992 |
| H | -3.113049 | -0.737648 | -1.971296 |
| H | -3.611352 | 0.053636  | -0.470992 |
| H | -1.255636 | 2.484199  | -0.840056 |
| H | 1.816153  | 2.020389  | 1.354906  |

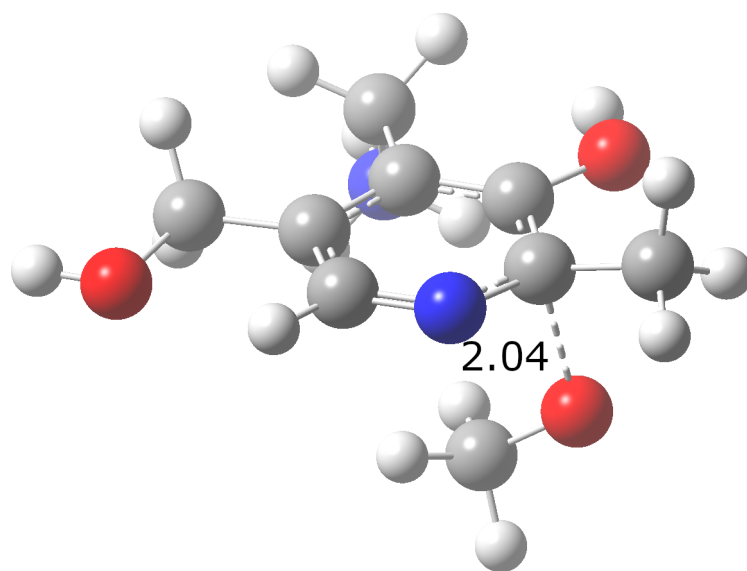

TS-H<sub>2</sub>PM(0)(OCH<sub>3</sub>,C3)<sup>+</sup>•

Charge=1, Multiplicity=2

|   |           |           |           |
|---|-----------|-----------|-----------|
| C | 0.550650  | 2.056306  | -0.424203 |
| C | 1.277143  | 0.870982  | -0.265684 |
| C | -0.837883 | -0.248904 | -0.313387 |
| C | -1.469935 | 1.004341  | -0.620341 |
| N | -0.773507 | 2.124114  | -0.631212 |
| H | 1.081949  | 2.998809  | -0.426703 |
| C | -2.937004 | 1.033676  | -0.868777 |
| H | -3.187559 | 0.455609  | -1.761984 |
| H | -3.475744 | 0.592148  | -0.025608 |
| H | -3.267492 | 2.058946  | -1.005072 |
| C | 2.767477  | 0.931190  | -0.093982 |
| H | 3.258801  | 0.237052  | -0.777501 |
| H | 3.115335  | 1.940282  | -0.312921 |
| O | 3.072299  | 0.584132  | 1.262661  |
| H | 4.030016  | 0.585126  | 1.359886  |
| C | 0.580422  | -0.318917 | -0.261543 |
| C | 1.219555  | -1.662250 | -0.092174 |
| H | 2.281511  | -1.585303 | 0.103714  |
| H | 0.743391  | -2.210538 | 0.717768  |
| O | -1.472137 | -1.423158 | -0.526466 |
| O | -1.089939 | 0.076205  | 1.651174  |
| C | -1.939805 | -0.921688 | 2.152017  |
| H | -2.072421 | -0.706685 | 3.219896  |
| H | -2.932346 | -0.900471 | 1.690176  |
| H | -1.511480 | -1.923529 | 2.061961  |
| N | 1.055185  | -2.486798 | -1.332289 |
| H | 1.489114  | -2.026408 | -2.133875 |
| H | 1.495266  | -3.399883 | -1.211309 |
| H | -2.430015 | -1.313180 | -0.585933 |
| H | 0.064436  | -2.629037 | -1.538489 |

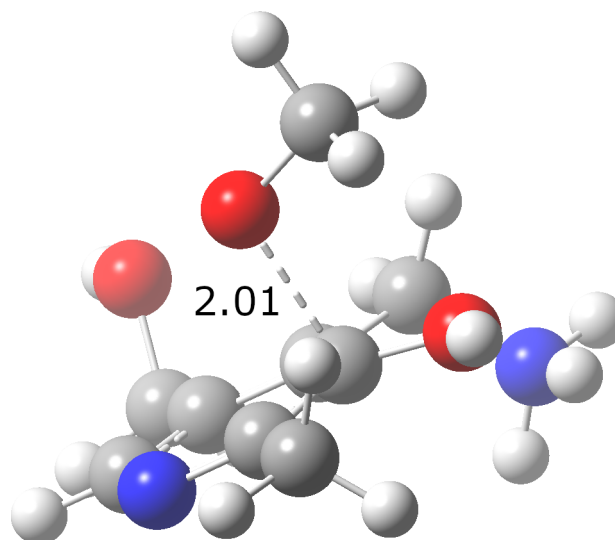

TS-H<sub>2</sub>PM(+)(OCH<sub>3</sub>,C4)<sup>+</sup>•

Charge=1, Multiplicity=2

|   |           |           |           |
|---|-----------|-----------|-----------|
| C | 0.962284  | -1.655821 | 0.292968  |
| C | 1.211016  | -0.320347 | 0.364869  |
| C | -1.202091 | 0.051539  | 0.419593  |
| C | -1.399293 | -1.336966 | 0.338893  |
| N | -0.320017 | -2.111034 | 0.278109  |
| H | 1.730175  | -2.410648 | 0.261776  |
| C | -2.756700 | -1.935077 | 0.331714  |
| H | -3.300337 | -1.624673 | 1.223901  |
| H | -3.307940 | -1.572858 | -0.537140 |
| H | -2.698584 | -3.019980 | 0.300970  |
| C | 2.621528  | 0.208344  | 0.383444  |
| H | 2.756058  | 0.889094  | -0.460049 |
| H | 2.783923  | 0.773971  | 1.300453  |
| O | 3.596702  | -0.818962 | 0.357051  |
| H | 3.630334  | -1.191513 | -0.529971 |
| C | 0.114118  | 0.592551  | 0.350935  |
| C | 0.334749  | 2.031927  | 0.749124  |
| H | 0.453267  | 2.052712  | 1.833096  |
| H | 1.251372  | 2.407014  | 0.300127  |
| O | -2.266707 | 0.827716  | 0.504331  |
| O | 0.043194  | 1.036447  | -1.605939 |
| C | -0.165066 | -0.056425 | -2.461098 |
| H | -0.012567 | 0.333895  | -3.474339 |
| H | 0.573349  | -0.848842 | -2.306712 |
| H | -1.180403 | -0.454413 | -2.394769 |
| H | -0.464994 | -3.115227 | 0.224655  |
| N | -0.827407 | 2.863414  | 0.392395  |
| H | -0.861284 | 3.684692  | 0.982639  |
| H | -0.751057 | 3.163686  | -0.571832 |
| H | -1.878114 | 1.826469  | 0.487467  |

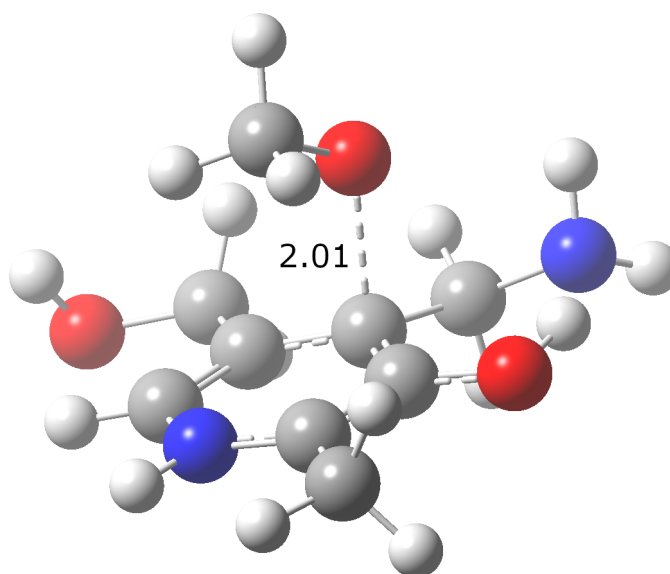

TS-H<sub>2</sub>PM(0)(OCH<sub>3</sub>,C4)<sup>+</sup>•

Charge=1, Multiplicity=2

|   |           |           |           |
|---|-----------|-----------|-----------|
| C | 0.453561  | -1.607908 | 0.774866  |
| C | 0.996181  | -0.425800 | 0.355464  |
| C | -1.272678 | 0.369170  | 0.107507  |
| C | -1.726178 | -0.889133 | 0.550985  |
| N | -0.877998 | -1.845018 | 0.878386  |
| H | 1.094508  | -2.429822 | 1.057538  |
| C | -3.197554 | -1.131813 | 0.667765  |
| H | -3.651938 | -0.421853 | 1.360023  |
| H | -3.685610 | -1.003384 | -0.299430 |
| H | -3.370806 | -2.142346 | 1.026888  |
| C | 2.485970  | -0.230534 | 0.224695  |
| H | 2.717011  | 0.016196  | -0.812878 |
| H | 2.813231  | 0.605943  | 0.847797  |
| O | 3.235702  | -1.392144 | 0.540205  |
| H | 3.197604  | -1.537993 | 1.490957  |
| C | 0.112698  | 0.612328  | -0.080634 |
| C | 0.621622  | 2.028210  | -0.202340 |
| H | 1.642547  | 2.047236  | -0.564091 |
| H | 0.018800  | 2.627625  | -0.875633 |
| O | -2.228896 | 1.276327  | -0.165638 |
| O | 0.115047  | 0.428353  | -2.025069 |
| C | 0.153279  | -0.918178 | -2.432478 |
| H | 0.101958  | -0.896020 | -3.526471 |
| H | 1.079674  | -1.417619 | -2.140693 |
| H | -0.710805 | -1.482226 | -2.071103 |
| N | 0.605030  | 2.702401  | 1.135000  |
| H | -0.337612 | 2.723736  | 1.529205  |
| H | 1.214327  | 2.215478  | 1.795528  |
| H | -1.883225 | 2.089752  | -0.551448 |
| H | 0.934885  | 3.665266  | 1.049134  |

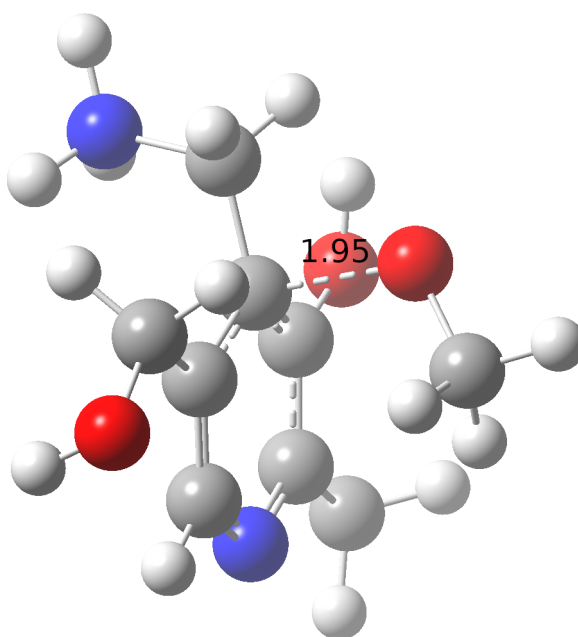

TS-H<sub>2</sub>PM(±)(OCH<sub>3</sub>,C4)<sup>+</sup>•

Charge=1, Multiplicity=2

|   |           |           |           |
|---|-----------|-----------|-----------|
| C | 0.518441  | 1.557154  | 0.804105  |
| C | 1.010675  | 0.343254  | 0.421015  |
| C | -1.305897 | -0.458473 | 0.117591  |
| C | -1.743305 | 0.854946  | 0.500650  |
| N | -0.828882 | 1.759723  | 0.817457  |
| H | 1.124608  | 2.391190  | 1.111361  |
| C | -3.185674 | 1.183771  | 0.588104  |
| H | -3.664804 | 0.981777  | -0.370572 |
| H | -3.661057 | 0.543011  | 1.332232  |
| H | -3.336062 | 2.226293  | 0.859322  |
| C | 2.489581  | 0.090429  | 0.373699  |
| H | 2.730237  | -0.774397 | 0.997225  |
| H | 2.775150  | -0.140165 | -0.656518 |
| O | 3.182376  | 1.240999  | 0.835271  |
| H | 4.124785  | 1.054590  | 0.791217  |
| C | 0.109051  | -0.648761 | -0.024321 |
| O | -2.139866 | -1.384319 | -0.093095 |
| H | -1.157907 | 2.678402  | 1.100477  |
| C | 0.542424  | -2.053164 | -0.322273 |
| H | 1.599395  | -2.135019 | -0.545517 |
| H | -0.036262 | -2.455038 | -1.145588 |
| N | 0.256390  | -2.923026 | 0.864346  |
| H | -0.743996 | -2.891682 | 1.075966  |
| H | 0.513549  | -3.891594 | 0.670244  |
| O | 0.079302  | -0.240336 | -2.152717 |
| C | 0.351952  | 1.104475  | -2.421541 |
| H | 0.353478  | 1.200955  | -3.515920 |
| H | -0.423604 | 1.774331  | -2.038041 |
| H | 1.336235  | 1.417298  | -2.061551 |
| H | 0.775718  | -2.609367 | 1.685198  |

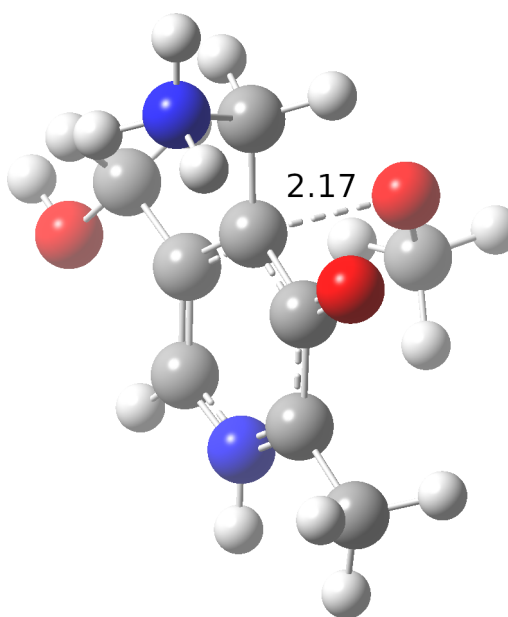

TS-H<sub>2</sub>PM(±)(OCH<sub>3</sub>,C6)<sup>+</sup>•

Charge=1, Multiplicity=2

|   |           |           |           |
|---|-----------|-----------|-----------|
| C | -0.366634 | -1.478343 | -0.955664 |
| C | 0.621385  | -0.494619 | -0.899562 |
| C | -1.059466 | 1.123272  | -0.151221 |
| C | -2.042377 | 0.084988  | -0.320221 |
| N | -1.651722 | -1.113261 | -0.740305 |
| C | -3.474683 | 0.337380  | -0.035033 |
| H | -3.813863 | 1.206189  | -0.599610 |
| H | -4.082906 | -0.527269 | -0.290454 |
| H | -3.599783 | 0.567942  | 1.024429  |
| C | 2.041706  | -0.891578 | -1.184412 |
| H | 2.087446  | -1.954976 | -1.414233 |
| H | 2.424614  | -0.328525 | -2.037109 |
| O | 2.821845  | -0.601228 | -0.016730 |
| H | 3.750943  | -0.723144 | -0.237946 |
| C | 0.283948  | 0.790597  | -0.516435 |
| C | 1.302528  | 1.885210  | -0.420685 |
| H | 2.132117  | 1.736416  | -1.103157 |
| H | 0.841795  | 2.849314  | -0.606555 |
| O | -1.402227 | 2.258375  | 0.287198  |
| H | -2.364639 | -1.829274 | -0.847388 |
| N | 1.875935  | 1.923483  | 0.962194  |
| H | 2.525118  | 2.703039  | 1.069062  |
| H | 1.135628  | 2.019148  | 1.658734  |
| H | 2.374720  | 1.041754  | 1.121623  |
| O | 0.134248  | -2.403836 | 1.011629  |
| C | -0.093200 | -1.427545 | 1.980203  |
| H | -0.041558 | -1.938574 | 2.952466  |
| H | 0.658601  | -0.634182 | 1.972039  |
| H | -1.102461 | -1.001788 | 1.911206  |
| H | -0.205434 | -2.460282 | -1.364936 |

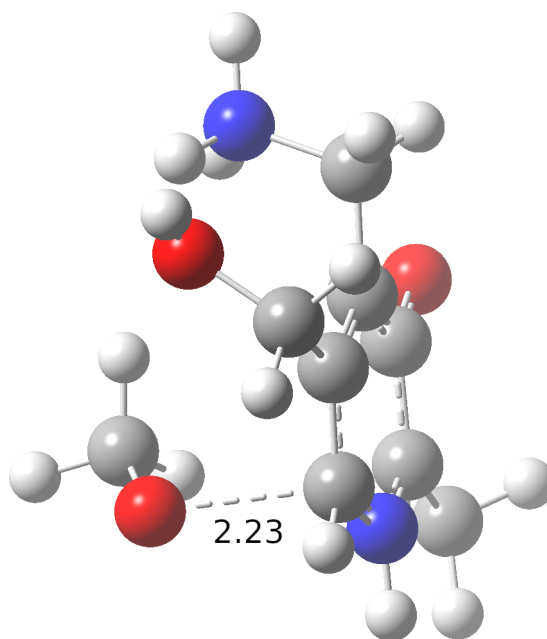

TS-H<sub>2</sub>PM(+)(OCH<sub>3</sub>,C6)<sup>+</sup>•

Charge=1, Multiplicity=2

|   |           |           |           |
|---|-----------|-----------|-----------|
| C | 0.582608  | -1.332038 | -0.692927 |
| C | 0.863902  | 0.041583  | -0.669374 |
| C | -1.458518 | 0.463630  | -0.263701 |
| C | -1.732421 | -0.915038 | -0.346016 |
| N | -0.712699 | -1.728213 | -0.604271 |
| C | -3.101263 | -1.461135 | -0.187270 |
| H | -3.464861 | -1.240625 | 0.817140  |
| H | -3.771585 | -0.976116 | -0.896730 |
| H | -3.108704 | -2.535962 | -0.350020 |
| C | 2.299846  | 0.485555  | -0.777286 |
| H | 2.439813  | 1.046812  | -1.700611 |
| H | 2.520415  | 1.150876  | 0.060242  |
| O | 3.206861  | -0.601185 | -0.805522 |
| H | 3.080406  | -1.098593 | 0.014152  |
| C | -0.162344 | 0.954607  | -0.446543 |
| C | 0.106458  | 2.436180  | -0.365158 |
| H | 0.994285  | 2.670084  | -0.945639 |
| H | -0.717869 | 2.976796  | -0.839531 |
| O | -2.530158 | 1.230445  | -0.009209 |
| H | -0.909813 | -2.721357 | -0.691132 |
| N | 0.338097  | 2.834853  | 1.029987  |
| H | 0.544051  | 3.826684  | 1.044176  |
| H | -0.519966 | 2.714168  | 1.556362  |
| O | 1.378444  | -1.731306 | 1.121621  |
| C | 0.697731  | -1.039421 | 2.133602  |
| H | 0.982059  | -1.528671 | 3.073292  |
| H | 0.975268  | 0.014605  | 2.183639  |
| H | -0.389490 | -1.147412 | 2.043140  |
| H | 1.268372  | -2.057726 | -1.093061 |
| H | -2.317333 | 2.172789  | -0.022524 |

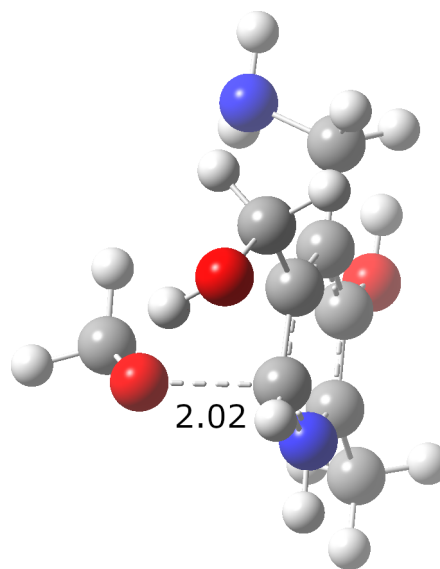

TS-H<sub>2</sub>PM(0)(OCH<sub>3</sub>,C6)<sup>+</sup>•

Charge=1, Multiplicity=2

|   |           |           |           |
|---|-----------|-----------|-----------|
| C | 0.332861  | 1.531052  | -0.878527 |
| C | -0.630441 | 0.502768  | -0.860639 |
| C | 1.112675  | -0.969123 | -0.189120 |
| C | 2.039814  | 0.101818  | -0.331739 |
| N | 1.658044  | 1.299675  | -0.713089 |
| C | 3.486043  | -0.157721 | -0.059445 |
| H | 3.624376  | -0.483660 | 0.972537  |
| H | 3.863850  | -0.952182 | -0.704120 |
| H | 4.056016  | 0.751171  | -0.229006 |
| C | -2.057394 | 0.845552  | -1.163480 |
| H | -2.132824 | 1.907268  | -1.392622 |
| H | -2.409998 | 0.273446  | -2.024017 |
| O | -2.856022 | 0.531394  | -0.012444 |
| H | -3.783833 | 0.611458  | -0.257694 |
| C | -0.236304 | -0.779372 | -0.490848 |
| C | -1.230322 | -1.904887 | -0.411397 |
| H | -2.025702 | -1.773590 | -1.137546 |
| H | -0.775304 | -2.875676 | -0.584125 |
| O | 1.646840  | -2.137930 | 0.221939  |
| N | -1.874679 | -1.939196 | 0.938643  |
| H | -2.520267 | -2.726023 | 1.010706  |
| H | -1.176583 | -2.020484 | 1.678879  |
| O | -0.237971 | 2.326214  | 0.899587  |
| C | 0.061355  | 1.448483  | 1.949146  |
| H | -0.029919 | 2.029988  | 2.875121  |
| H | -0.627218 | 0.600875  | 2.005722  |
| H | 1.094976  | 1.086891  | 1.904676  |
| H | 0.071598  | 2.476571  | -1.328567 |
| H | 0.988914  | -2.836988 | 0.314057  |
| H | -2.394132 | -1.061257 | 1.060762  |

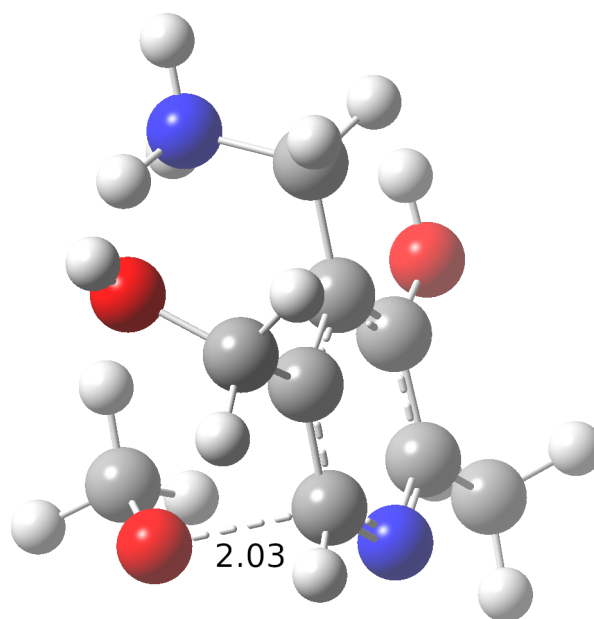



Cartesian coordinates and structures of the optimized geometries in pentyl ethanoate of the located transition states. In the pictures, distances are given in Å.

TS-HPM(0)(-H,C8)(OOH)•

Charge=0, Multiplicity=2

|   |           |           |           |
|---|-----------|-----------|-----------|
| C | -1.482235 | -0.665390 | -0.088443 |
| C | -0.190359 | -0.221964 | -0.396994 |
| C | 0.017167  | 1.166516  | -0.426960 |
| C | -1.060796 | 2.000063  | -0.167743 |
| N | -2.290584 | 1.570511  | 0.116949  |
| H | -0.920573 | 3.075088  | -0.196970 |
| C | 0.847980  | -1.245871 | -0.759438 |
| H | 0.813362  | -1.515652 | -1.815771 |
| H | 2.044839  | -0.792899 | -0.656501 |
| C | 1.357005  | 1.814397  | -0.651575 |
| H | 1.979897  | 1.259451  | -1.343857 |
| H | 1.209084  | 2.818694  | -1.049409 |
| O | -1.828551 | -1.970928 | -0.055301 |
| O | 2.111812  | 1.897793  | 0.572318  |
| H | 1.605118  | 2.423415  | 1.199755  |
| N | 0.809036  | -2.402934 | 0.070030  |
| H | 1.413525  | -3.142469 | -0.262499 |
| H | 1.034677  | -2.190372 | 1.036280  |
| C | -2.508016 | 0.263095  | 0.162405  |
| C | -3.886310 | -0.232477 | 0.474010  |
| H | -4.284781 | -0.815906 | -0.357509 |
| H | -3.873640 | -0.886539 | 1.346851  |
| H | -4.537906 | 0.616691  | 0.664048  |
| H | -0.999276 | -2.494831 | -0.019221 |
| O | 3.237464  | -0.631433 | -0.317269 |
| O | 3.156627  | -0.566053 | 1.060531  |
| H | 2.901074  | 0.367038  | 1.192152  |

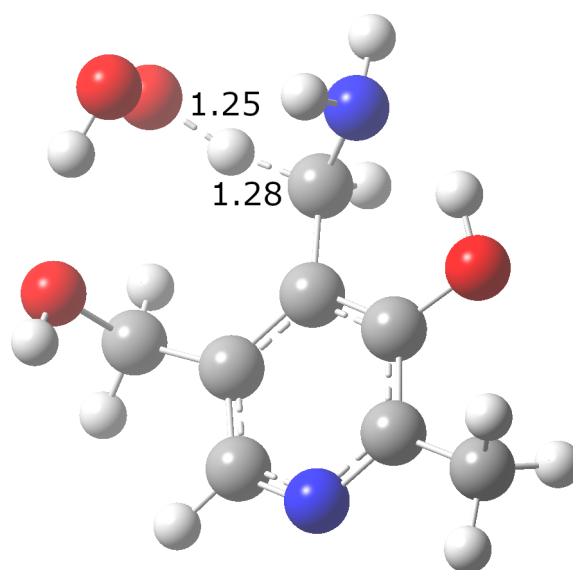

## TS-HPM(0)(-H,C9)(OOH)•

Charge=0, Multiplicity=2

|   |           |           |           |
|---|-----------|-----------|-----------|
| C | 1.715424  | 0.472082  | -0.147855 |
| C | 0.335809  | 0.365833  | 0.019047  |
| C | -0.189949 | -0.915571 | 0.234938  |
| C | 0.680958  | -2.000150 | 0.216248  |
| N | 1.994992  | -1.891184 | 0.028199  |
| H | 0.294929  | -3.000823 | 0.370797  |
| C | -0.516113 | 1.605781  | -0.115566 |
| H | -0.538909 | 1.881664  | -1.172704 |
| H | -1.534063 | 1.402987  | 0.205310  |
| C | -1.631525 | -1.182914 | 0.451269  |
| H | -2.254359 | -0.855314 | -0.586424 |
| H | -1.857802 | -2.247475 | 0.526328  |
| O | 2.319606  | 1.662881  | -0.352273 |
| O | -2.187295 | -0.435040 | 1.481287  |
| H | -3.121311 | -0.662192 | 1.554304  |
| N | 0.097031  | 2.726218  | 0.617901  |
| H | -0.375158 | 3.594219  | 0.400689  |
| H | 0.020910  | 2.577752  | 1.617313  |
| C | 2.517901  | -0.680940 | -0.141579 |
| C | 3.994907  | -0.552280 | -0.347400 |
| H | 4.457480  | -1.532780 | -0.265376 |
| H | 4.213282  | -0.130824 | -1.330132 |
| H | 4.429287  | 0.120911  | 0.392865  |
| H | 1.682637  | 2.352301  | -0.027282 |
| O | -3.165159 | -0.404848 | -1.406725 |
| O | -4.156985 | 0.049999  | -0.563972 |
| H | -3.986894 | 0.999358  | -0.489536 |

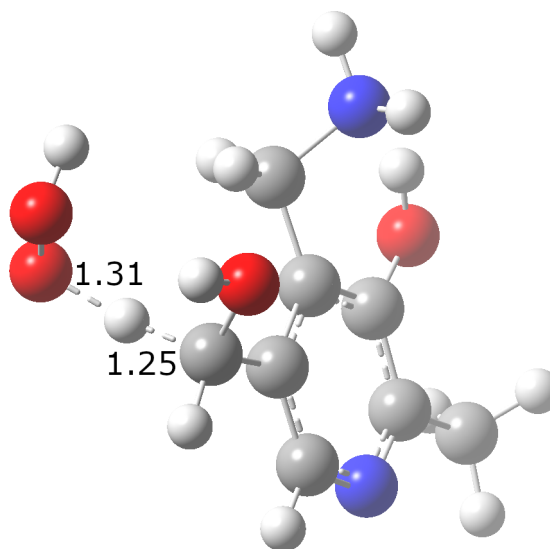

TS-HPM(0)(-H,C7)(OCH<sub>3</sub>)•

Charge=0, Multiplicity=2

|   |           |           |           |
|---|-----------|-----------|-----------|
| C | 0.291749  | 0.221862  | -0.586564 |
| C | -1.083838 | 0.359318  | -0.390848 |
| C | -1.818903 | -0.797889 | -0.119319 |
| C | -1.145450 | -2.014547 | -0.072953 |
| N | 0.160843  | -2.148463 | -0.281679 |
| H | -1.698192 | -2.923252 | 0.138272  |
| C | -1.724129 | 1.720993  | -0.526563 |
| H | -1.785674 | 1.963872  | -1.590252 |
| H | -2.732528 | 1.705414  | -0.120162 |
| C | -3.302978 | -0.763787 | 0.137420  |
| H | -3.828446 | -0.244279 | -0.661843 |
| H | -3.683085 | -1.786300 | 0.176714  |
| O | 1.084567  | 1.282234  | -0.843625 |
| O | -3.631030 | -0.062582 | 1.338854  |
| H | -3.183177 | -0.500508 | 2.068052  |
| N | -0.880503 | 2.749417  | 0.108572  |
| H | -1.213355 | 3.675040  | -0.128727 |
| H | -0.920773 | 2.662371  | 1.117452  |
| C | 0.880020  | -1.055236 | -0.539422 |
| C | 2.331747  | -1.201671 | -0.751550 |
| H | 2.745928  | -0.518472 | -1.488592 |
| H | 2.876836  | -0.880916 | 0.269723  |
| H | 2.620528  | -2.235426 | -0.917563 |
| H | 0.571219  | 2.084087  | -0.547311 |
| O | 3.622462  | -0.339809 | 1.274220  |
| C | 4.381158  | 0.676568  | 0.688690  |
| H | 4.937012  | 1.142857  | 1.511552  |
| H | 5.110407  | 0.292376  | -0.030184 |
| H | 3.756662  | 1.444050  | 0.225681  |

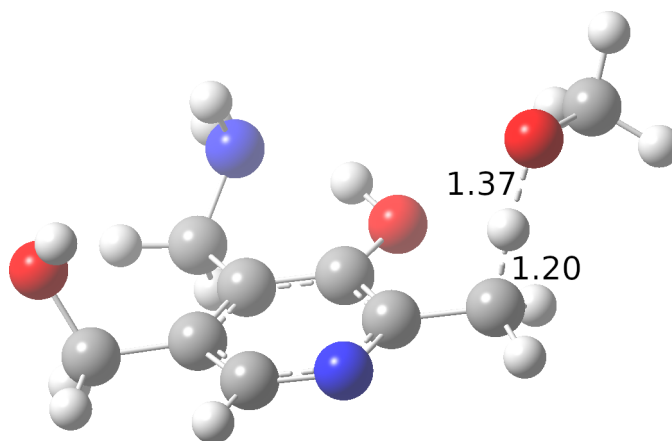

TS-HPM(0)(-H,C8)(OCH<sub>3</sub>)•

Charge=0, Multiplicity=2

|   |           |           |           |
|---|-----------|-----------|-----------|
| C | -1.072905 | -0.309409 | 0.464120  |
| C | 0.255349  | 0.105999  | 0.327290  |
| C | 0.487209  | 1.344548  | -0.298350 |
| C | -0.603170 | 2.084759  | -0.716309 |
| N | -1.873425 | 1.687997  | -0.573135 |
| H | -0.449659 | 3.044753  | -1.195937 |
| C | 1.379965  | -0.776520 | 0.731917  |
| H | 1.572358  | -1.511215 | -0.195313 |
| H | 2.320814  | -0.239483 | 0.831788  |
| C | 1.878108  | 1.883043  | -0.508665 |
| H | 2.513983  | 1.147053  | -0.998399 |
| H | 1.826652  | 2.761289  | -1.154765 |
| O | -1.416461 | -1.494056 | 1.006180  |
| O | 2.531728  | 2.204519  | 0.721089  |
| H | 1.997799  | 2.861467  | 1.176406  |
| N | 1.063190  | -1.651861 | 1.853751  |
| H | 1.745530  | -2.395880 | 1.927472  |
| H | 1.084519  | -1.132368 | 2.725709  |
| C | -2.114915 | 0.519455  | 0.003069  |
| C | -3.533302 | 0.064552  | 0.156026  |
| H | -3.702266 | -0.864226 | -0.391749 |
| H | -3.765224 | -0.135188 | 1.203047  |
| H | -4.200229 | 0.833751  | -0.225444 |
| H | -0.591744 | -1.865440 | 1.421252  |
| O | 1.617943  | -2.379595 | -1.256493 |
| C | 0.474694  | -2.115778 | -2.010214 |
| H | -0.444332 | -2.417440 | -1.501899 |
| H | 0.416221  | -1.069319 | -2.325387 |
| H | 0.575358  | -2.721547 | -2.920608 |

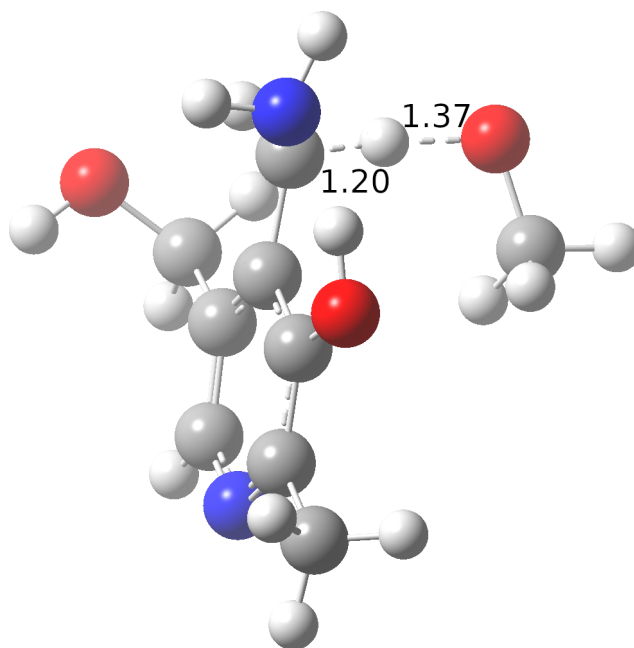

TS-HPM(0)(-H,C9)(OCH<sub>3</sub>)•

Charge=0, Multiplicity=2

|   |           |           |           |
|---|-----------|-----------|-----------|
| C | 1.787285  | -0.263322 | -0.181709 |
| C | 0.703260  | 0.612605  | -0.207477 |
| C | -0.554576 | 0.094435  | 0.131225  |
| C | -0.651764 | -1.249026 | 0.464416  |
| N | 0.390297  | -2.083690 | 0.475334  |
| H | -1.614891 | -1.666836 | 0.730916  |
| C | 0.909331  | 2.045972  | -0.639104 |
| H | 1.028670  | 2.060838  | -1.725097 |
| H | 0.038898  | 2.649193  | -0.388475 |
| C | -1.774544 | 0.969277  | 0.171208  |
| H | -1.945626 | 1.532009  | -0.744637 |
| H | -2.732950 | 0.254010  | 0.257557  |
| O | 3.038744  | 0.134606  | -0.499692 |
| O | -1.796708 | 1.871459  | 1.239194  |
| H | -1.531988 | 1.404178  | 2.038791  |
| N | 2.150234  | 2.584179  | -0.055833 |
| H | 2.381931  | 3.473919  | -0.478161 |
| H | 2.034046  | 2.741615  | 0.938357  |
| C | 1.591524  | -1.611497 | 0.162914  |
| C | 2.761498  | -2.546328 | 0.171807  |
| H | 3.216723  | -2.607571 | -0.817955 |
| H | 3.532958  | -2.192188 | 0.857074  |
| H | 2.428773  | -3.535114 | 0.477913  |
| H | 3.042715  | 1.123867  | -0.405530 |
| O | -3.827243 | -0.559123 | 0.185997  |
| C | -3.936231 | -0.918406 | -1.161536 |
| H | -4.135853 | -0.059599 | -1.808338 |
| H | -3.060879 | -1.467841 | -1.520065 |
| H | -4.799297 | -1.591697 | -1.223317 |

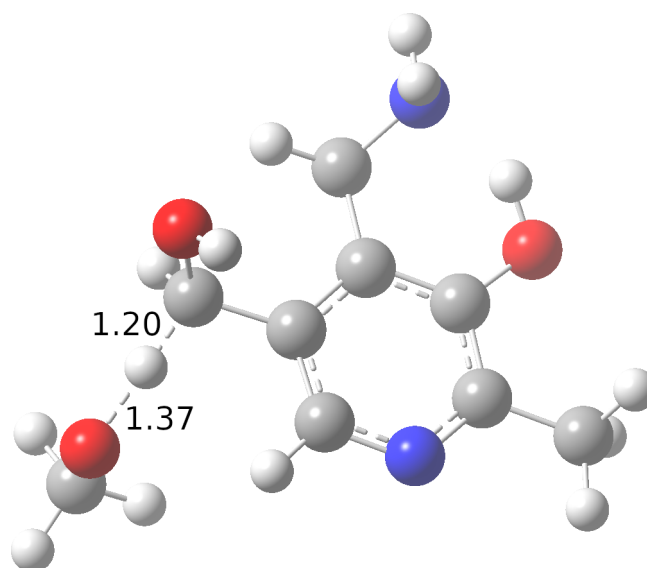

TS-HPM(0)(-H,N2)(OCH<sub>3</sub>)•

Charge=0, Multiplicity=2

|   |           |           |           |
|---|-----------|-----------|-----------|
| C | -1.346571 | 0.452381  | 0.428065  |
| C | -0.074468 | 0.067142  | 0.843646  |
| C | 0.327709  | -1.238992 | 0.555259  |
| C | -0.566252 | -2.056123 | -0.132492 |
| N | -1.777149 | -1.676404 | -0.528759 |
| H | -0.277855 | -3.073293 | -0.372213 |
| C | 0.792949  | 1.098723  | 1.535216  |
| H | 0.231315  | 1.530225  | 2.367742  |
| H | 1.695246  | 0.649614  | 1.937723  |
| C | 1.690487  | -1.789298 | 0.898624  |
| H | 2.041297  | -1.392312 | 1.853134  |
| H | 1.614371  | -2.870013 | 1.005566  |
| O | -1.735879 | 1.731438  | 0.708165  |
| O | 2.643253  | -1.552444 | -0.128674 |
| H | 2.583650  | -0.621877 | -0.401804 |
| N | 1.179681  | 2.197302  | 0.661012  |
| H | 1.925897  | 1.891255  | -0.097535 |
| H | 0.361651  | 2.585014  | 0.198204  |
| C | -2.178446 | -0.435875 | -0.255756 |
| C | -3.549365 | -0.012390 | -0.696604 |
| H | -4.179438 | 0.258925  | 0.154898  |
| H | -3.506926 | 0.841092  | -1.378572 |
| H | -4.022787 | -0.840558 | -1.217378 |
| H | -2.639163 | 1.881803  | 0.410814  |
| O | 2.304855  | 1.068468  | -1.082204 |
| C | 1.413495  | 1.012463  | -2.165099 |
| H | 1.098370  | 2.008957  | -2.484681 |
| H | 1.959522  | 0.549554  | -2.995399 |
| H | 0.542069  | 0.387442  | -1.949722 |

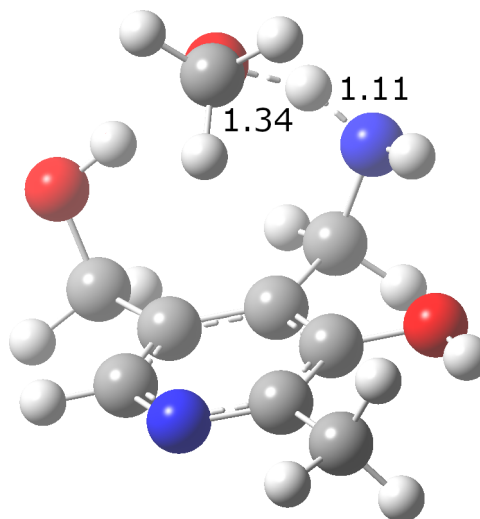

TS-HPM(0)(OCH<sub>3</sub>,C2)•

Charge=0, Multiplicity=2

|   |           |           |           |
|---|-----------|-----------|-----------|
| C | -0.893618 | 0.596040  | -0.466121 |
| C | 0.471316  | 0.827416  | -0.274386 |
| C | 1.325396  | -0.274839 | -0.310522 |
| C | 0.774337  | -1.538744 | -0.584253 |
| N | -0.511323 | -1.767873 | -0.770693 |
| H | 1.435339  | -2.389481 | -0.686525 |
| C | 0.978564  | 2.245090  | -0.131466 |
| H | 1.972849  | 2.253647  | 0.314215  |
| H | 1.065036  | 2.684521  | -1.127803 |
| C | 2.816894  | -0.112116 | -0.123845 |
| H | 3.231471  | 0.463237  | -0.951970 |
| H | 3.012976  | 0.448482  | 0.794271  |
| O | -1.781429 | 1.587003  | -0.521625 |
| H | -1.333985 | 2.383151  | -0.105952 |
| O | 3.526836  | -1.338430 | -0.108945 |
| H | 3.290867  | -1.821102 | 0.688176  |
| C | -1.381985 | -0.744226 | -0.613530 |
| N | 0.023275  | 3.065957  | 0.630941  |
| H | 0.044534  | 2.822279  | 1.614155  |
| H | 0.251457  | 4.048275  | 0.552013  |
| C | -2.780878 | -0.957928 | -1.099866 |
| H | -3.055317 | -1.995930 | -0.927694 |
| H | -2.835015 | -0.749591 | -2.171123 |
| H | -3.471666 | -0.300595 | -0.580142 |
| O | -1.864951 | -0.798757 | 1.318336  |
| C | -0.874916 | -1.369583 | 2.103188  |
| H | -1.254599 | -1.377352 | 3.134134  |
| H | -0.643656 | -2.401997 | 1.821952  |
| H | 0.051724  | -0.779329 | 2.113235  |

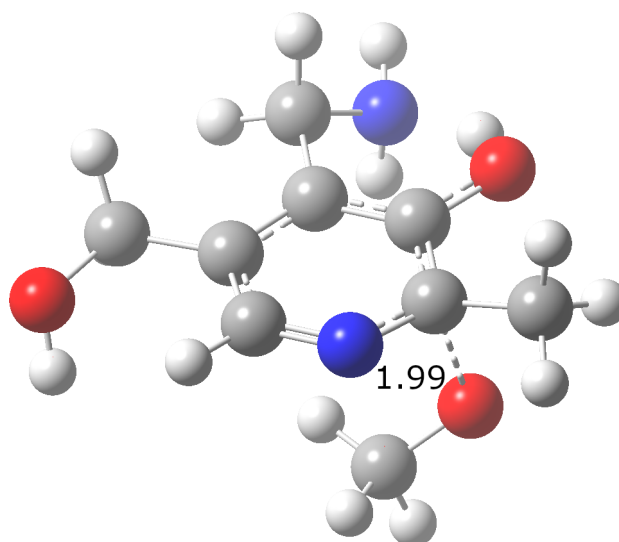

TS-HPM(0)(OCH<sub>3</sub>,C3)•

Charge=0, Multiplicity=2

|   |           |           |           |
|---|-----------|-----------|-----------|
| C | 0.330599  | -2.024625 | -0.009296 |
| C | 1.141684  | -0.889890 | 0.060362  |
| C | -0.809471 | 0.382698  | -0.541739 |
| C | -1.532410 | -0.856748 | -0.633361 |
| N | -0.969716 | -2.010950 | -0.341895 |
| H | 0.757260  | -2.996781 | 0.205754  |
| C | -2.976572 | -0.805134 | -0.993328 |
| H | -3.111258 | -0.413336 | -2.003040 |
| H | -3.403973 | -1.802526 | -0.928025 |
| H | -3.496809 | -0.125996 | -0.314453 |
| C | 2.587766  | -1.037070 | 0.435660  |
| H | 2.808518  | -0.439270 | 1.324788  |
| H | 2.794810  | -2.083329 | 0.667451  |
| O | 3.391088  | -0.598088 | -0.661631 |
| H | 4.313115  | -0.642882 | -0.395156 |
| C | 0.587686  | 0.342566  | -0.244317 |
| C | 1.385133  | 1.620199  | -0.240292 |
| H | 2.223355  | 1.523741  | 0.451548  |
| H | 1.809681  | 1.767092  | -1.235407 |
| O | -1.334878 | 0.835876  | 1.303144  |
| O | -1.356142 | 1.442174  | -1.146647 |
| N | 0.526005  | 2.772319  | 0.065438  |
| H | 0.159553  | 2.696522  | 1.007176  |
| H | 1.041382  | 3.637366  | -0.022103 |
| H | -0.812171 | 2.226371  | -0.847725 |
| C | -1.321022 | -0.189019 | 2.244524  |
| H | -2.109890 | -0.932021 | 2.080587  |
| H | -0.352956 | -0.706894 | 2.284148  |
| H | -1.475539 | 0.264795  | 3.231450  |

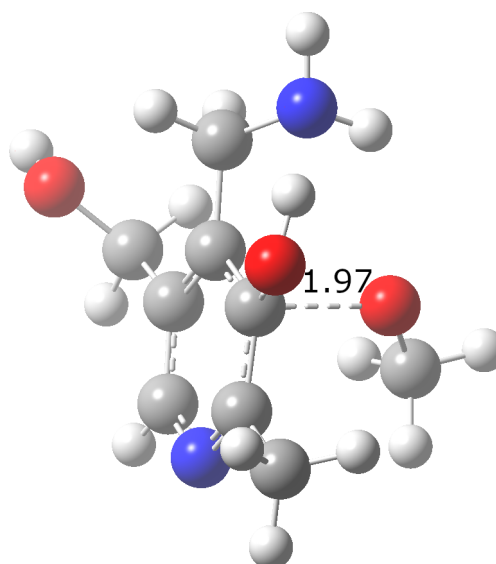



TS-HPM(0)(OCH<sub>3</sub>,C4)•

Charge=0, Multiplicity=2

|   |           |           |           |
|---|-----------|-----------|-----------|
| C | 0.890416  | -1.720577 | -0.286735 |
| C | 1.186402  | -0.387322 | -0.387817 |
| C | -1.201019 | 0.007870  | -0.415147 |
| C | -1.390977 | -1.386377 | -0.296976 |
| N | -0.370312 | -2.217680 | -0.234332 |
| H | 1.684017  | -2.454331 | -0.262485 |
| C | -2.786085 | -1.930012 | -0.259927 |
| H | -3.348149 | -1.496578 | 0.569029  |
| H | -3.324161 | -1.683228 | -1.176567 |
| H | -2.745497 | -3.010490 | -0.145852 |
| C | 2.606976  | 0.116135  | -0.415815 |
| H | 2.822535  | 0.582593  | -1.377872 |
| H | 2.723390  | 0.878939  | 0.358633  |
| O | 3.574039  | -0.907427 | -0.254250 |
| H | 3.503257  | -1.251938 | 0.640375  |
| C | 0.111016  | 0.552676  | -0.379983 |
| O | -2.277196 | 0.784384  | -0.512802 |
| H | -1.935527 | 1.741793  | -0.506794 |
| C | 0.336582  | 1.974618  | -0.846199 |
| H | 0.339259  | 1.975051  | -1.938227 |
| H | 1.310819  | 2.321479  | -0.504274 |
| N | -0.750888 | 2.852166  | -0.389437 |
| H | -0.641934 | 3.023138  | 0.602700  |
| H | -0.730296 | 3.737080  | -0.878625 |
| O | 0.189401  | 1.099143  | 1.540125  |
| C | -0.216182 | 0.090408  | 2.414314  |
| H | 0.090765  | 0.404091  | 3.419583  |
| H | -1.300467 | -0.060447 | 2.417600  |
| H | 0.287659  | -0.861871 | 2.210281  |

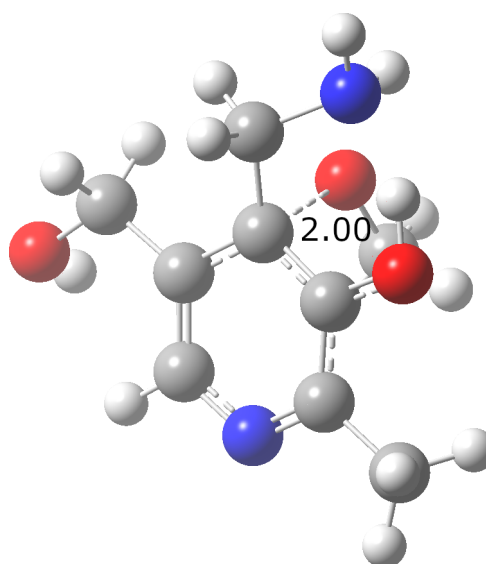

TS-HPM(0)(OCH<sub>3</sub>,C6)•

Charge=0, Multiplicity=2

|   |           |           |           |
|---|-----------|-----------|-----------|
| C | -1.180201 | 0.267748  | 0.756232  |
| C | -0.403316 | -0.860606 | 0.398512  |
| C | 1.386557  | 0.649283  | -0.039109 |
| C | 0.548630  | 1.725729  | 0.363498  |
| N | -0.679442 | 1.525437  | 0.782473  |
| H | -2.089330 | 0.117002  | 1.319316  |
| C | 1.095038  | 3.118365  | 0.331143  |
| H | 1.990585  | 3.196890  | 0.949105  |
| H | 1.381194  | 3.396444  | -0.684482 |
| H | 0.337578  | 3.807741  | 0.695616  |
| C | -1.067310 | -2.215665 | 0.336029  |
| H | -0.854704 | -2.662416 | -0.641183 |
| H | -0.646816 | -2.877036 | 1.096299  |
| O | -2.459961 | -2.155439 | 0.553926  |
| H | -2.783975 | -1.462368 | -0.046374 |
| C | 0.905619  | -0.668160 | -0.009840 |
| C | 1.772001  | -1.812190 | -0.487660 |
| H | 1.421753  | -2.752831 | -0.063657 |
| H | 1.681486  | -1.886319 | -1.573531 |
| O | 2.622736  | 0.949658  | -0.444406 |
| H | 3.126723  | 0.077172  | -0.465741 |
| O | -2.348095 | 0.147306  | -0.925280 |
| C | -3.159894 | 1.285289  | -0.915574 |
| H | -3.753614 | 1.372816  | 0.001461  |
| H | -2.587862 | 2.205198  | -1.061565 |
| H | -3.858105 | 1.182434  | -1.755967 |
| N | 3.190316  | -1.564057 | -0.175193 |
| H | 3.372364  | -1.726262 | 0.808389  |
| H | 3.786421  | -2.189076 | -0.701947 |

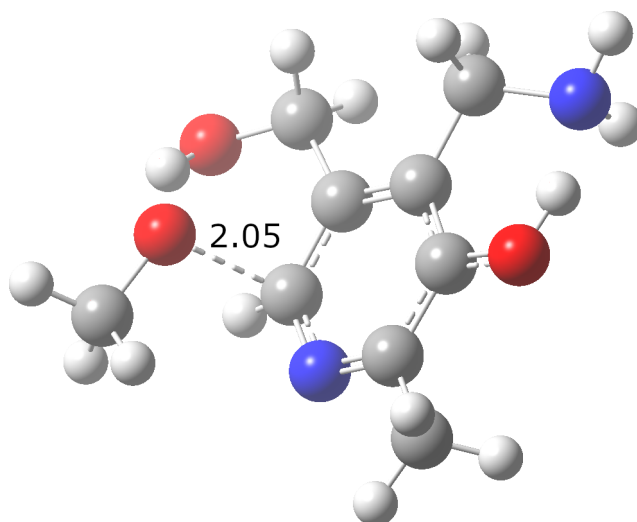

Supplement: antioxidants-08-00344-s001.pdf [file antioxidants-08-00344-s001.pdf]
